# Supplementary material
Source: MDPI journal article supplement (https://www.mdpi.com/2073-4441/15/2/249)
Supplement: s1 [file s1 › water-2022799-supplementary.pdf]

# Using single-species and whole community stream mesocosm exposures for identifying major ion effects in doses mimicking resource extraction wastewaters:

## Supplemental Materials

### Additional specifics on mesocosm set-up

The mesocosm tiles were each 110 cm<sup>2</sup> and situated in two rows of 44. Gravel for the mesocosm's lower gravel section was prepared from a nominal 2.54 cm washed and dried river rock. The cleaned gravel filled rectangular plastic baskets were fabricated onsite from clear polycarbonate sheeting, 0.12 cm thick. Basket dimensions were 13.5 cm W x 23.5 cm L x 4.7 cm D. All sides of each basket were perforated with several 1.86 cm diameter holes to allow for free water exchange through the gravel and between adjacent baskets. The mesocosm gravel section consisted of 2 rows of 10 baskets snugged together without gaps between them or the side walls to form a concentric gravel surface.

In the head tank feeding a pair of mesocosms a mixed inflow of river and reverse osmosis water is split equally between receiving mesocosms by a partition at the top of the head tank, overflowing a sharp crested weir. The head tank sits atop a leveling platform to ensure equal distribution of inflow to each mesocosm.

Inflow mixing volumes: The mesocosms scheduled for the control treatment received 2.37 l min<sup>-1</sup> RO flow, while those scheduled for the 500, 1000, and 2000 TDS treatments of both major ion recipes were set to receive 1.89, 1.14 and 0.95 l min<sup>-1</sup>, respectively. For the 750 TDS treatment the RO inflow was set to 1.32 l min<sup>-1</sup>.

ESF river water delivery: Two 20.32 cm pipes extend from the sump in the riverbank into the river, situated just above the bed: one situated at approximately 3.048 m (10 ft) from the bank and the other at 6.1 m (20 ft). Each intake pipe is screened with 0.318 cm mesh. River water flows passively between the riverbed and the sump by hydrostatic pressure. Screw-drive pumps in the sump deliver the river water to the ESF over 300 m (984 ft) and a flow rate of 1893 l min<sup>-1</sup> (500 gal min<sup>-1</sup>) through a 20.32 cm (8 in) buried pipe. The river water enters an 1893 l (500 gal) supply tank inside the ESF. From there it flows by hydrostatic pressure through separate 7.62 cm (3 in) PVC pipes to the headworks of the mesocosms.

RW/RO source mixing: The difference in inflow RW/RO source mixing also produced differences in the concentrations of background major ions and nutrients among scheduled treatments. These differences were expected to be of little consequence to the mesocosm communities. For example, during the colonization period the average reactive phosphorus concentrations were between 35 and 61 ug l<sup>-1</sup>, while nitrite-nitrate (NO<sub>2-3</sub>) was between 218 and 382 ug l<sup>-1</sup> for the most to the least RO-diluted inflows, respectively (Table 1). Based on nutrient targets for Ohio streams and other studies conducted at ESF these ranges were not considered broad enough to have significant consequences for stream primary producers under the light limiting conditions designed for the experiment.

### Supplemental information on recipe preparation

The DWB and MTM dosing recipes were configured based on data sources provided by our colleagues in the EPA Region 3 Office in Wheeling, WV (i.e., Amy Bergdale, Maggie Passmore, Greg Pond, and Louis

Reynolds through personal communications). The targeted major ion concentrations and relative composition was decided by consensus and favored the DWB recipe for maximizing the number of doses tested because at the time these discussions were occurring the most relevant risk management question was regarding DWB wastewaters discharging from permitted WWTPs in the region. The data considered included values from the literature as well as unpublished information collected by Region 3 staff during site visits, or was obtained from state officials or industry professionals. All data were screened for specificity to the Central Appalachians, and included well, effluent, or instream data from sources in Pennsylvania, West Virginia, eastern Ohio, and eastern Kentucky. For the DWB recipe, the data sources included chemistry analyses done on flowback, produced, and treated prior to discharge wastewaters from deep wells. At the time, instream data was minimal or unverifiable. The original complement included data from 60 sources. These were screened to 28 sources of data most applicable to the Marcellus shale and potential for discharge to surface waters. Relevant references included: Dresel and Rose [1], Osborn and McIntosh [2], Hayes [3], Stout, *et al.* [4], Breen, *et al.* [5], and USEPA [6]. Since these represent the parent sources and have higher concentrations of TDS and major ions than would be expected after they are mixed with receiving waters, we determined the average TDS and the average fraction of TDS contributed by specific ions from this data (Table S2).

We then conducted an analysis of facilities permitted to discharge oil and gas (O&G) wastewaters to determine design flows. We paired this information with an analysis of each facility's receiving water's streamflow using USGS's Streamstats online tool (<https://streamstats.usgs.gov/ss/>). We estimated the instream TDS concentration after the mixing with stream baseflows and WWTP discharge assuming the average TDS from source analysis. 37 WWTPs were considered applicable in this analysis and estimated average TDS after mixing was 1104 mg/l with a range of 175 to 8707 mg/l, with nearly half of facilities discharges resulting in an instream TDS near or over 500 mg/l (Table S3). These conditions were taken as a concern for the protection of aquatic life. We used this exercise to define a range of environmentally relevant TDS concentrations in streams receiving discharges of DWB wastewaters and set our target doses for the DWB recipe at 100, 500, 750, 1000, and 2000 mg/l TDS.

The 100 to 2000 range of TDS for the DWB recipe was considered relevant also for streams receiving MTM leachates. The basis for this came from the analysis of information, in this case mostly published (or in review), provided again by Region 3 colleagues (Table S2). Relevant references included Kunz, *et al.* [7], USEPA [8], Pond, *et al.* [9], Fritz, *et al.* [10], Hartman, *et al.* [11], and Bryant, *et al.* [12]. Next, we used the fraction of TDS comprised by specific major ions from the well data, the instream data collected from reaches receiving MTM leachates, and the complement of industrial salts that could be obtained at reasonable cost that could be combined to meet the target TDS concentrations and specific ion composition desired.

Each recipe's target ion composition comes from averaging multiple data sources. For the DWB recipe, it is derived from the average ion fractions of an average TDS from 28 wells. For the MTM recipe, the ion composition was meant to approximate the average among nine published sources, many of which included statistics from multiple streams. The chemical formula and the relative solubilities of the industrial salts constrained the extent to which the realized concentrations were able to directly reflect our targeted average concentrations. Namely, in pre-dosing bench scale tests and early in the dosing period MTM stock solutions were sparged with CO<sub>2</sub> gas to increase the solubility of the calcium salts used. This, however, became intractable in terms of the amount of CO<sub>2</sub> required and considering that

some precipitation and scale development occurred regardless when the stock solutions mixed with the other inflows and interacted with the mesocosm benthos. The inability to achieve complete calcium dissolution resulted in lower in-stream calcium and bicarbonate concentrations during the dosing period than was nominally targeted (Table S2). Because of difficulty in getting powdered calcium carbonate into solution at the meso-scale, we increased the levels of calcium chloride and sodium bicarbonate combined with the other MTM salts (Table S1). We did not allow these adjustments to skew the ionic composition or relative proportions of major ions so as not to be reflective of MTM sources generally. Comparing the realized average concentrations in Table 1 of the main text and those given in Table S2, suggest that our recipes generally reflected the concentration and ion composition of DWB and MTM sources across the region. Table S4 includes osmolarities and the concentrations of the major ions analyzed expressed as activities (mM) as supporting information to Table 1 in the main text.

### **Supplemental methods for assessing mesocosm biota**

**Periphyton:** The periphyton slurry was prepared by selecting 5 pieces of surficial gravel from each one among two gravel baskets selected randomly for sampling on each event (weekly to biweekly). Among the 10 pieces of gravel, each was scrubbed with a stiff brush and rinsed with DI water until visually clean of biofilm over a plastic container where all the material was pooled. The resulting slurry was diluted to a consistent volume and gently homogenized with a hand mixer while aliquot sampling took place. Slurry aliquots used for dry mass and AFDM, and Chl-a were filtered separately. Dry mass and AFDM were determined by drying to constant weight the contents on the filter paper and, then combusting at 550 °C for 3 hr and reweighing, respectively. The Chl-a filter was frozen immediately, and within 28 d was processed through an acetone extraction procedure, followed by spectrometric determination of pigment concentration following USEPA Method 445.0. Algae I&E occurred at the genus level (Palmer cell on inverted microscope) at 400x magnification. Average cell dimensions were obtained for each genus so that the enumerated periphytic algae could be expressed in term of cell density (CD, #·cm<sup>-2</sup>) or biovolume density (BD, μm<sup>3</sup>·cm<sup>-2</sup>). All periphyton metrics were normalized to the surface area of gravel sampled. Each piece of gravel was individual wrapped with tinfoil. Half the weight of the tinfoil was used in a calibration equation that regressed known surface areas of tinfoil pieces to their weight.

**Invertebrates:** For emergence sampling, The UV light emitted by the lamp attracts emerging insects where the vaporized ethanol anesthetizes them, and they collect in the dish. The emergence traps are hung 0.61 m above the water surface flowing over the gravel in the middle of the section. A temporary wall is erected to separate adjacent mesocosms. Cables spanning the length of the gravel section support the emergence trap and an opaque shroud that is used to enclose the entire gravel section. The shrouds eliminate the potential for emergers to escape or be attracted to an adjacent mesocosm's UV light trap.

**Drift:** Invertebrates entrained in each drift net were rinsed into the net's cod bucket attachment that was then elutriated over a 250 μm sieve. Contents retained on the sieve were preserved in 70% ethanol until I&E. Drift was sampled at the same frequency as emergence except that an additional sampling event took place during the 24 hr period immediately after dosing began. This event, which occurred at ETD=2 (i.e., 24hr after dosing began) took place to determine if there was a significant and immediate drift response to the excess TDS (see figure S3).

**QA:** 90% quality control (QC) criteria established that the 10<sup>th</sup> sample processed for gravel, drift, emergence, and soft algae by an individual analyst be verified by a different analyst before proceeding to the next set of 10. One sample of every 20 was re-identified to QC the taxonomy.

Bench test protocols: The *C. dubia* Pre Dose- and During Dosing-Bench tests were maintained at 25 °C on a 16 hr light/ 8 hr dark cycling and recording fecundity over 7 d or until 60% of control females had three broods, but no longer than 8 d. One individual < 24 hr old was placed per 30 ml test chamber and 15 ml solution volume, which was replicated 10 times. A moderately hard reconstituted water (MHRW) internal control was also used. Feeding took place daily with 0.1 ml FFAY and 0.1 ml algae. The *P. promelas* tests followed the same format except that 10 individual, < 24 hr old, larvae were placed in a 300 ml test chamber with 250 ml solution volume that was replicated 4 times. Larvae were fed 0.15 ml of newly hatched brine shrimp twice daily. The *N. triangulifer* tests differed in that they were 14 d tests. One, < 24 hr old, larvae was added to each of ten 30 ml test chambers filled with 15 ml solution. Feeding took place daily with the addition of mixed diatoms: fed 0.2 mL mixed diatom suspension/slurry per test chamber for Day 0 to 9 and 0.4 mL mixed diatom suspension/slurry for the remainder of the test duration (14 d). The *H. azteca* tests were 10 d at 23 °C. Ten, 7 to 10 d old individuals were added to 300 ml chambers with 200 ml solution, replicated 4 times. A 5.08 cm (2 in) dia. disc of 400 µm Nitex® mesh was added to each chamber as substrate for the organisms. Feeding of 1 ml of FFAY took place daily.

Ex situ format: 2 L plastic containers screened with a 500 µm mesh lid receive water via a line plumbed into the recirculating flow of the mesocosm. Flow rate was regulated manually with a ball valve and split to supply up to four ex situ tanks per mesocosm. Valves were positioned to approximate a 20 min ex situ tank residence time. Under these hydraulic conditions there was no detectable change in dissolved oxygen, water temperature, or pH from that fluxing through the mesocosms. Water free flowed after discharge from the delivery line through the mesh lid and entered behind an internal baffle that forced circulation to the bottom of the container before existing through a screened overflow near the top. The overflow from the ex situ tank collected in a plastic tub that held the tanks and acted as a water bath to buffer temperature fluctuations. Water from the outer holding tub overflowed back to the mesocosm, so that there was no net loss of water from the mesocosms as the result of feeding water to the ex situ tanks. Any solutes and particulate material or biota entrained in the mesocosm recirculation flow and smaller than 500 µm could enter the ex situ tank. A tile colonized with biofilm/periphyton in the mesocosm was added to each tank prior to adding the test species.

*N. triangulifer*: Twenty < 5 d old individuals were added to each of 4 replicate ex situ tanks per mesocosm for 21 d. Other than making sure that the screens on the inflow and overflow were kept from clogging with detritus no other manipulation was done to the tanks during the test. The test ended when the contents of each tank were passed through a 250 µm sieve to retrieve individuals.

*P. promelas*: Two replicate ex-situ tanks for each mesocosm were used for larvae from each culture. Ten individuals were added to each tank. After a 7 d exposure time the larval fish were recovered by sieving. Survivors were added to a weigh boat that was dried to constant weight at 80 °C and then weighed.

Bivalve cages: Cages housing the bivalves were made from stainless steel mesh; 14.7 cm W x 25 cm L with 3.32 mm diameter circular perforations every 1.68 mm were used to hold the bivalve species. Each cage was partitioned with a plastic insert and 20 individuals of each species were added to separate halves of the partitioned cage.

### Supplemental materials for data analyses

Redundancy analysis (RDA) is a constrained principal components analysis (PCA) and is carried out by performing a PCA on the fitted values from a multivariate regression model [13]. The results characterize changes in the community assemblage with dose. The primary and secondary axis scores from the RDA performed at each individual time point were used in a dose response modeling (DRM) framework to further investigate changes in communities with dose. The RDA was used initially to explore the effect of

dose on the community. Following the RDA, a DRM was fit to the estimated axis scores to further characterize the relationship between the community and dose. Lastly, the significant community-level ED<sub>50</sub>s were aggregated into a community-level RSD.

The principal response curve (PRC) analysis, described in Van den Brink and Braak [14] estimates community effects over both time and dose. The species loadings displayed on the right side of the PRC plots in figures 7 and S2 can be interpreted as follows: Species with negative loadings have relatively small abundances in the control dose, and species with positive loadings have relatively large abundances at the control dose. If the plot indicates a positive effect from control, the species with positive loadings are estimated to be more abundant than the control dose, and species with negative loadings are estimated to be less abundant than the control dose. If the plot indicates a negative effect, the species with negative loadings are estimated to be more abundant than the control dose, and species with positive loadings are estimated to be less abundant than the control dose. An estimated effect of 0 indicates little difference in species abundances from the control dose. Dose and time are both treated as categorical variables in the PRC analysis. The PRC plot displays a significance star when the results of a permutation test indicate at least one difference in community assemblage across dose. The estimated relationship between the community assemblage and dose is not obvious, however, without looking closely at each line on the PRC plot and the dose level it represents.

Evaluating DRM fits: Rules for evaluating the automated DRM fits using LL2.4 model and making final selections of inclusion for the taxa, community, and system-level RSDs are as follows:

1. Split single taxa, community, and system measures for RSD analysis
2. RA variables should not be considered applicable for single taxa because response pattern could be a product of changing proportions of other taxa. So, only use straight counts, CD or BD.
3. Check for redundancies: e.g., if ETD 56 has a good DRM fit and significant response as does ETD 4356 for a given variable then choose the lowest EC<sub>50</sub> and smallest confidence bounds if EC<sub>50</sub>s are very similar.
4. A measure's response that is significant on multiple sampling events can be included in the RSD for community and system-level responses. For the taxa-level measures, if multiple sampling dates are significant select the event with the lowest sensitivity. If sensitivities are similar, then prioritize the model with smallest confidence interval. The communities are dynamic with respect to assemblage make-up, taxa importance, phenology, and re-colonization rate. The more consistent a response is across sampling events the more evidence of a true effect, but if the effect is such that a taxa's population is seriously impacted, then dose-responses in the future may not be significant. With the stages of taxa life histories not being in synch with the time course of the experiment (i.e., not all taxa start at the same life stage at the same time the experiment begins, in contrast to the tests with culturable species) it is rational to think that significant responses could 'come-and-go', as it were, and as the experiment progresses. Furthermore, with spatial heterogeneity of taxa presence and absence, individuals present in one event may not necessarily be present in the next pending on their evenness across space and where the randomized selections for sample locations determine where samples are taken from.
5. Select only one CD or BD of an algal periphyton taxa-level response by date; don't use both. Most of the time when both are significant the EC<sub>50</sub>s, and CLs are similar. Chose BD over CD in these cases because BD is contextually more a reflection of the extent of taxa occupancy, but at the taxa-level if one has a significant model fit so should the other as the biovolume is computed from a

constant multiplier. However, the multiplier can produce order of magnitude conversions and for marginal model fits this scale-up can affect the modeling result.

6. For community and system-level measures:
  - a. when the same one is significant for both BD or CD and RA choose the lowest  $EC_{50}$ , and smallest confidence bounds if  $EC_{50}$ s are similar.
  - b. Use distance instead of similarity. When a significant model can be fit to one, so is the case for the other. This rule just says use distance to be consistent.
  - c. Although multiple distance measures are used for estimating relative distance from controls and RDA axis scores are tested. We found the Hellinger transformation equivalent to representing the community as proportions (i.e., RA). We also explored differences in RSD fits using measures based on Bray-Curtis and Euclidean transformations: They were negligible. So, we chose to use distances and axis scores based on the Bray-Curtis transformation for consistency.
  - d. Consider algal community-level BD and CD -based measures as separate community responses. We do this because some algal groups will have much greater biovolume to cell size ratios than others, so this captures both aspects.
  - e. Community-level RA variables are considered for inclusion.
  - f. This rule is based on the appropriateness of using both a community-level variable's RDA axis scores as well as the variable's distance-based responses when two or more DRMs are significant in the same RSD. The former represents the relative distances among samples in species ordination space and tests if those relative distances fit a dose response relationship, while the latter is a measure of how dissimilar a sample's taxa assemblage is to the control and fits a DRM to the dissimilarity, which is fitting a curve to one less data point. We choose to use only one when both are significant for the same response by ETD, and that is the one with lowest  $EC_{50}$  and/or smallest confidence interval. These measures are somewhat redundant. The dissimilarity is more straightforward and intuitive to interpret. However, axis scores have an advantage of providing species loading and thus interpretation of the species contribution to community changes with dose. There's also precedent for fitting models to linear combinations of responses, while there is less precedent for fitting dose response models to distances, although still legitimate.

Table S1. Table of industrial salts chemical purchases used for dosing recipes

| Chemicals                             | Chemical Name                  | Total (kg<br>or gal) | Total<br>(lbs or<br>gal) | ship | ship<br>unit | Total<br>Units |
|---------------------------------------|--------------------------------|----------------------|--------------------------|------|--------------|----------------|
| Mountain top mine recipe's chemicals  |                                |                      |                          |      |              |                |
| MgSO <sub>4</sub> . 7H <sub>2</sub> O | Magnesium Sulfate Heptahydrate | 1164                 | 2564                     | 50   | lbs          | 52             |
| K <sub>2</sub> SO <sub>4</sub>        | Potassium Sulfate              | 40                   | 88                       | 50   | lbs          | 2              |
| CaCl <sub>2</sub>                     | Calcium Chloride               | 23                   | 23                       | 55   | gal          | 2              |
| CaCO <sub>3</sub>                     | Calcium Carbonate              | 176                  | 388                      | 50   | lbs          | 9              |
| NaHCO <sub>3</sub>                    | Sodium Bicarbonate             | 62                   | 136                      | 50   | lbs          | 3              |
| CaSO <sub>4</sub> . 2H <sub>2</sub> O | Calcium Sulfate Dihydrate      | 37                   | 82                       | 50   | lbs          | 2              |
| Deep well brine recipe's chemicals    |                                |                      |                          |      |              |                |
| NaCl                                  | Sodium Chloride                | 685                  | 1509                     | 50   | lbs          | 30             |
| CaCl <sub>2</sub>                     | Calcium Chloride, 32% solution | 69                   | 152                      | 55   | gal          | 3              |
| SrCl <sub>2</sub> . 6H <sub>2</sub> O | Strontium Chloride             | 49                   | 107                      | 50   | lbs          | 2              |
| BaCl <sub>2</sub> . 2H <sub>2</sub> O | Barium Chloride                | 18                   | 40                       | 50   | lbs          | 1              |
| MgCl <sub>2</sub> . 6H <sub>2</sub> O | Magnesium Chloride             | 70                   | 155                      | 50   | lbs          | 3              |
| NaBr                                  | Sodium Bromide, 40% solution   | 1                    | 3                        | 55   | gal          | 1              |
| KCl                                   | Potassium Chloride             | 8                    | 17                       | 50   | lbs          | 1              |

Table S2. Targeted in-stream nominal TDS and major ion concentrations for the experimental dosing period along with statistical summaries of data used to design the relative ionic composition of each recipe. All values are mg/l.

| Analyte                       | Control | DWB recipe targeted doses |     |      |      |        | DWB data statistical summary* |        |        |       |                 | MTM recipe targeted doses |       |       | MTM in streams statistical summary* |       |      |      |
|-------------------------------|---------|---------------------------|-----|------|------|--------|-------------------------------|--------|--------|-------|-----------------|---------------------------|-------|-------|-------------------------------------|-------|------|------|
|                               |         |                           |     |      |      |        | Mean                          | StDev  | Min    | Max   | Fraction of TDs |                           |       |       | Mean                                | StDev | Min  | Max  |
| TDS                           | 100     | 500                       | 750 | 1000 | 2000 | 180554 | 31579                         | 117994 | 281832 |       |                 | 500                       | 1000  | 2000  | 895                                 | 56    | 847  | 2040 |
| Cl <sup>-</sup>               | 1       | 268                       | 406 | 547  | 1115 | 100547 | 16068                         | 71200  | 128369 | 0.631 |                 | 29                        | 52    | 127   | 30                                  | 37    | 3    | 91   |
| SO <sub>4</sub> <sup>2-</sup> | 6       | 7                         | 8   | 9    | 10   | 207    | 599                           | 40     | 1460   | 0.001 |                 | 219                       | 438   | 1156  | 880                                 | 424   | 366  | 1490 |
| HCO <sub>3</sub> <sup>-</sup> | 42      | 48                        | 59  | 65   | 71   | nd     | nd                            | nd     | nd     | nd    |                 | 126                       | 236   | 258   | 157                                 | 90    | 39   | 309  |
| Br <sup>-</sup>               | trace   | 2                         | 3   | 4    | 8    | 836    | 205                           | 479    | 1150   | 0.005 |                 | trace                     | trace | trace | nd                                  | nd    | nd   | 0.65 |
| Na <sup>+</sup>               | 1       | 120                       | 179 | 239  | 478  | 37977  | 6295                          | 30100  | 50000  | 0.238 |                 | 19                        | 40    | 97    | 77                                  | 124   | 5    | 341  |
| Ca <sup>2+</sup>              | 9       | 45                        | 67  | 89   | 178  | 14248  | 3870                          | 10000  | 22283  | 0.089 |                 | 47                        | 95    | 220   | 125                                 | 57    | 67   | 246  |
| Mg <sup>2+</sup>              | 1       | 5                         | 7   | 9    | 18   | 1406   | 544                           | 572    | 2682   | 0.009 |                 | 49                        | 96    | 257   | 137                                 | 90    | 16   | 262  |
| Sr <sup>2+</sup>              | trace   | 7                         | 11  | 14   | 28   | 2175   | 1043                          | 675    | 4000   | 0.014 |                 | trace                     | trace | trace | nd                                  | nd    | 0.02 | 0.07 |
| K <sup>+</sup>                | 1       | 2                         | 3   | 4    | 8    | 640    | 397                           | 130    | 1300   | 0.004 |                 | 17                        | 33    | 85    | 14                                  | 7     | 8    | 25   |
| Ba <sup>2+</sup>              | trace   | 5                         | 7   | 9    | 18   | 1513   | 2559                          | 4.87   | 8730   | 0.009 |                 | trace                     | trace | trace | nd                                  | nd    | 0.03 | 0.05 |

\*Descriptive statistics from combining unpublished data provided by USEPA Region III staff and relevant published literature (see supplemental text).

Table S3: Estimates of mixing zone total dissolved solids from PA NPDES permits and stream flow statistics.

| Plant Type                                                     | #  | Drainage Area Above Point Source (mi <sup>2</sup> ) | Mixing Zone - Two yr, low flow TDS (mg/l) | Mixing Zone - Ten yr, low flow TDS (mg/l) | Mixing Zone - Ten yr, base flow TDS (mg/l) | Potentially problematic |
|----------------------------------------------------------------|----|-----------------------------------------------------|-------------------------------------------|-------------------------------------------|--------------------------------------------|-------------------------|
| Treating or Proposed to Treat Marcellus O&G WW (as of 10/2010) | 12 | 5194                                                | 175                                       | 175                                       | 175                                        |                         |
|                                                                | 15 | 5134                                                | 175                                       | 175                                       | 175                                        |                         |
|                                                                | 17 | 5213                                                | 175                                       | 175                                       | 175                                        |                         |
|                                                                | 14 | 133                                                 | 179                                       | 182                                       | 175                                        |                         |
|                                                                | 18 | 11582                                               | 180                                       | 182                                       | 176                                        |                         |
|                                                                | 13 | 42                                                  | 186                                       | 192                                       | 177                                        |                         |
|                                                                | 47 | 18441                                               | 182                                       | 186                                       | 177                                        |                         |
|                                                                | 11 | 5413                                                | 213                                       | 239                                       | 181                                        |                         |
|                                                                | 48 | 501                                                 | 215                                       | 240                                       | 183                                        |                         |
|                                                                | 46 | 5687                                                | 216                                       | 244                                       | 184                                        |                         |
|                                                                | 44 | 5977                                                | 224                                       | 251                                       | 185                                        |                         |
|                                                                | 6  | 5220                                                | 252                                       | 308                                       | 187                                        |                         |
|                                                                | 39 | 310                                                 | 286                                       | 360                                       | 197                                        |                         |
|                                                                | 37 | 1548                                                | 282                                       | 344                                       | 198                                        |                         |
|                                                                | 43 | 3130                                                | 301                                       | 380                                       | 201                                        |                         |
|                                                                | 2  | 4531                                                | 392                                       | 557                                       | 208                                        |                         |
|                                                                | 41 | 114                                                 | 383                                       | 556                                       | 216                                        |                         |
|                                                                | 19 | 702                                                 | 334                                       | 417                                       | 217                                        |                         |
|                                                                | 40 | 90                                                  | 442                                       | 619                                       | 232                                        |                         |
|                                                                | 16 | 139                                                 | 1530                                      | 2554                                      | 373                                        | 1                       |
|                                                                | 3  | 191                                                 | 1282                                      | 2075                                      | 392                                        | 2                       |
|                                                                | 8  | 1365                                                | 1681                                      | 3235                                      | 452                                        | 3                       |
|                                                                | 5  | 1360                                                | 1482                                      | 2271                                      | 454                                        | 4                       |
|                                                                | 10 | 51                                                  | 992                                       | 1093                                      | 481                                        | 5                       |
|                                                                | 42 | 1113                                                | 1628                                      | 2268                                      | 546                                        | 6                       |
|                                                                | 7  | 200                                                 | 5568                                      | 11090                                     | 721                                        | 7                       |
|                                                                | 38 | 37                                                  | 1727                                      | 1823                                      | 1074                                       | 8                       |
|                                                                | 4  | 14                                                  | 7883                                      | 15783                                     | 1444                                       | 9                       |
|                                                                | 20 | 191                                                 | 6455                                      | 15302                                     | 1488                                       | 10                      |
|                                                                | 35 | 45                                                  | 21371                                     | 43799                                     | 2511                                       | 11                      |
|                                                                | 50 | 45                                                  | 18082                                     | 27200                                     | 3274                                       | 12                      |
|                                                                | 22 | 9                                                   | 3847                                      | 3082                                      | 4722                                       | 13                      |
|                                                                | 21 | 80                                                  | 47627                                     | 79174                                     | 7272                                       | 14                      |
|                                                                | 45 | 12                                                  | 47920                                     | 98014                                     | 8707                                       | 15                      |
|                                                                | 1  | 4                                                   | 87719                                     | 121564                                    | 13356                                      | detention ponds         |
|                                                                | 9  | 11                                                  | 117731                                    | 149178                                    | 40719                                      | will treat wRO          |
|                                                                | 49 | 3                                                   | 110914                                    | 142575                                    | 44629                                      | reuse/recycle           |
| Treating Coal Bed Methane WW                                   | 30 | 1737                                                | 276                                       | 371                                       | 194                                        |                         |
|                                                                | 29 | 1724                                                | 277                                       | 373                                       | 194                                        |                         |
|                                                                | 25 | 758                                                 | 616                                       | 902                                       | 276                                        | 1                       |
|                                                                | 33 | 1310                                                | 981                                       | 1459                                      | 348                                        | 2                       |
|                                                                | 27 | 200                                                 | 2118                                      | 3809                                      | 493                                        | 3                       |
|                                                                | 32 | 396                                                 | 2452                                      | 3954                                      | 607                                        | 4                       |
|                                                                | 23 | 410                                                 | 2953                                      | 4779                                      | 701                                        | 5                       |
|                                                                | 24 | 6                                                   | 8276                                      | 21534                                     | 716                                        | 6                       |
|                                                                | 28 | 14                                                  | 7940                                      | 17342                                     | 1269                                       | 7                       |
|                                                                | 26 | 2                                                   | 37705                                     | 82668                                     | 2831                                       | 8                       |
|                                                                | 31 | 29                                                  | 32882                                     | 64224                                     | 4284                                       | 9                       |
|                                                                | 36 | 51                                                  | 41259                                     | 75679                                     | 5815                                       | 10                      |
|                                                                | 34 | 18                                                  | 31724                                     | 59929                                     | 7160                                       | 11                      |

Table S4. Table 1's constituent concentrations expressed as activity determined from

| Period                        | Mesocosm | Recipe  | Nominal TDS Target (mg/l) | Observed TDS (mg/l) | Specific Conductivity ( $\mu\text{S}/\text{cm}$ ) | Ionic Strength (mM) | Osmolarity (mOsM) | Alkalinity (mg/l) | Hardness (mg/l) | pH  | Temp | Cl <sup>-</sup> (mM) | SO <sub>4</sub> <sup>2-</sup> (mM) | HCO <sub>3</sub> <sup>-</sup> (mM) | Br <sup>-</sup> (mM) | N_NO <sub>2-3</sub> <sup>-</sup> (mM) | P_PO <sub>4</sub> <sup>3-</sup> (mM) | Na <sup>+</sup> (mM) | Ca <sup>2+</sup> (mM) | Mg <sup>2+</sup> (mM) | Sr <sup>2+</sup> (mM) | K <sup>+</sup> (mM) | Ba <sup>2+</sup> (mM) | NH <sub>4</sub> <sup>+</sup> (mM) |
|-------------------------------|----------|---------|---------------------------|---------------------|---------------------------------------------------|---------------------|-------------------|-------------------|-----------------|-----|------|----------------------|------------------------------------|------------------------------------|----------------------|---------------------------------------|--------------------------------------|----------------------|-----------------------|-----------------------|-----------------------|---------------------|-----------------------|-----------------------------------|
| Colonization                  | E06.1.2  | NA      | 100                       | 87                  | 118                                               | 1.20                | 1.29              | 30.4              | 35.0            | 7.7 | 22.8 | 0.17                 | 0.06                               | 0.58                               | 0.00                 | 0.01                                  | 0.000                                | 0.16                 | 0.15                  | 0.09                  | 0.00                  | 0.03                | 0.000                 | 0.001                             |
|                               | E04.1.2  | NA      | 100                       | 73                  | 130                                               | 1.34                | 1.49              | 37.1              | 43.0            | 7.6 | 22.6 | 0.19                 | 0.06                               | 0.70                               | 0.00                 | 0.02                                  | 0.000                                | 0.17                 | 0.16                  | 0.09                  | 0.00                  | 0.04                | 0.000                 | 0.001                             |
|                               | E05.1.2  | NA      | 100                       | 106                 | 167                                               | 1.69                | 1.94              | 45.6              | 55.0            | 7.2 | 22.8 | 0.26                 | 0.08                               | 0.87                               | 0.00                 | 0.02                                  | 0.000                                | 0.22                 | 0.19                  | 0.12                  | 0.00                  | 0.05                | 0.000                 | 0.001                             |
|                               | E07.1.2  | NA      | 100                       | 116                 | 167                                               | 1.89                | 2.08              | 52.3              | 63.0            | 7.6 | 22.8 | 0.27                 | 0.08                               | 0.98                               | 0.00                 | 0.02                                  | 0.000                                | 0.24                 | 0.22                  | 0.13                  | 0.00                  | 0.06                | 0.000                 | 0.001                             |
|                               | E08.1.2  | NA      | 100                       | 141                 | 198                                               | 2.15                | 2.35              | 58.0              | 74.0            | 7.5 | 22.4 | 0.31                 | 0.09                               | 1.09                               | 0.00                 | 0.03                                  | 0.000                                | 0.27                 | 0.25                  | 0.15                  | 0.00                  | 0.06                | 0.000                 | 0.001                             |
|                               | E01.1.2  | NA      | 100                       | 68                  | 136                                               | 1.49                | 1.59              | 39.6              | 49.0            | 7.7 | 23.2 | 0.20                 | 0.06                               | 0.75                               | 0.00                 | 0.02                                  | 0.000                                | 0.18                 | 0.20                  | 0.10                  | 0.00                  | 0.04                | 0.000                 | 0.001                             |
|                               | E02.1.2  | NA      | 100                       | 109                 | 177                                               | 1.97                | 2.10              | 52.8              | 61.0            | 7.6 | 23.1 | 0.26                 | 0.08                               | 0.99                               | 0.00                 | 0.02                                  | 0.000                                | 0.24                 | 0.25                  | 0.13                  | 0.00                  | 0.05                | 0.000                 | 0.001                             |
|                               | E03.1.2  | NA      | 100                       | 113                 | 195                                               | 2.24                | 2.43              | 60.5              | 69.0            | 7.5 | 22.9 | 0.31                 | 0.09                               | 1.14                               | 0.00                 | 0.03                                  | 0.000                                | 0.27                 | 0.28                  | 0.15                  | 0.00                  | 0.06                | 0.000                 | 0.001                             |
| Dosing                        | E06.1.2  | Control | 100                       | 73                  | 114                                               | 1.34                | 1.40              | 33.4              | 41.7            | 7.5 | 22.3 | 0.15                 | 0.04                               | 0.63                               | 0.00                 | 0.03                                  | 0.000                                | 0.14                 | 0.22                  | 0.09                  | 0.00                  | 0.04                | 0.000                 | 0.001                             |
|                               | E04.1.2  | DWB     | 500                       | 540                 | 798                                               | 7.89                | 10.46             | 39.1              | 144.3           | 7.4 | 22.3 | 5.23                 | 0.04                               | 0.70                               | 0.03                 | 0.03                                  | 0.000                                | 3.26                 | 0.64                  | 0.19                  | 0.05                  | 0.17                | 0.015                 | 0.001                             |
|                               | E05.1.2  | DWB     | 750                       | 855                 | 1265                                              | 11.80               | 15.23             | 47.4              | 209.4           | 6.6 | 22.2 | 8.10                 | 0.04                               | 0.83                               | 0.04                 | 0.05                                  | 0.000                                | 4.09                 | 1.01                  | 0.25                  | 0.07                  | 0.17                | 0.022                 | 0.001                             |
|                               | E07.1.2  | DWB     | 1000                      | 1063                | 1543                                              | 15.60               | 20.01             | 53.4              | 297.1           | 6.9 | 22.2 | 10.28                | 0.05                               | 0.92                               | 0.05                 | 0.05                                  | 0.000                                | 6.46                 | 1.23                  | 0.25                  | 0.10                  | 0.22                | 0.024                 | 0.001                             |
|                               | E08.1.2  | DWB     | 2000                      | 2405                | 3505                                              | 34.40               | 42.34             | 58.3              | 561.7           | 7.4 | 21.8 | 25.29                | 0.04                               | 0.93                               | 0.12                 | 0.05                                  | 0.000                                | 12.19                | 2.15                  | 0.40                  | 0.17                  | 0.47                | 0.040                 | 0.001                             |
|                               | E01.1.2  | MTM     | 500                       | 458                 | 612                                               | 8.93                | 5.58              | 59.1              | 252.0           | 7.9 | 22.8 | 0.70                 | 1.11                               | 1.03                               | 0.00                 | 0.03                                  | 0.000                                | 0.67                 | 0.40                  | 1.00                  | 0.00                  | 0.28                | 0.000                 | 0.001                             |
|                               | E02.1.2  | MTM     | 1000                      | 799                 | 1074                                              | 17.10               | 10.04             | 91.1              | 468.6           | 7.9 | 22.8 | 1.19                 | 1.95                               | 1.52                               | 0.01                 | 0.04                                  | 0.000                                | 1.43                 | 0.43                  | 1.89                  | 0.00                  | 0.59                | 0.000                 | 0.001                             |
|                               | E03.1.2  | MTM     | 2000                      | 1677                | 2307                                              | 39.10               | 21.09             | 138.4             | 1188.0          | 7.6 | 22.5 | 2.39                 | 3.66                               | 2.17                               | 0.01                 | 0.04                                  | 0.000                                | 3.37                 | 0.45                  | 3.97                  | 0.00                  | 1.66                | 0.000                 | 0.000                             |
| Pre-Dose Bench Toxicity Assay | E06.1.2  | Control | 100                       | 72                  | 136                                               | 1.81                | 1.87              | 41.0              | 50.0            | 7.2 | 22.6 | 0.21                 | 0.06                               | 0.77                               | 0.00                 | 0.05                                  | 0.000                                | 0.21                 | 0.30                  | 0.10                  | 0.00                  | 0.04                | 0.000                 | 0.000                             |
|                               | E04.1.2  | DWB     | 500                       | 754                 | 1136                                              | 10.80               | 13.98             | 70.7              | 202.0           | 7.8 | 22.9 | 6.68                 | 0.07                               | 1.23                               | 0.03                 | 0.08                                  | 0.000                                | 4.49                 | 0.87                  | 0.21                  | 0.05                  | 0.13                | 0.019                 | 0.001                             |
|                               | E05.1.2  | DWB     | 750                       | 1102                | 1562                                              | 15.30               | 20.22             | 70.9              | 264.0           | 7.7 | 22.2 | 10.25                | 0.06                               | 1.21                               | 0.04                 | 0.08                                  | 0.000                                | 6.85                 | 1.06                  | 0.23                  | 0.07                  | 0.16                | 0.027                 | 0.001                             |
|                               | E07.1.2  | DWB     | 1000                      | 1491                | 2080                                              | 19.50               | 25.80             | 70.7              | 330.0           | 7.7 | 22.1 | 13.30                | 0.06                               | 1.18                               | 0.06                 | 0.07                                  | 0.000                                | 9.08                 | 1.23                  | 0.26                  | 0.09                  | 0.20                | 0.036                 | 0.001                             |
|                               | E08.1.2  | DWB     | 2000                      | 2869                | 3800                                              | 35.60               | 46.09             | 69.8              | 570.0           | 7.7 | 22.5 | 25.39                | 0.05                               | 1.10                               | 0.11                 | 0.07                                  | 0.000                                | 16.15                | 1.86                  | 0.36                  | 0.16                  | 0.30                | 0.033                 | 0.001                             |
|                               | E01.1.2  | MTM     | 500                       | 506                 | 742                                               | 11.10               | 6.70              | 74.5              | 342.0           | 6.7 | 22.8 | 0.35                 | 1.50                               | 1.31                               | 0.00                 | 0.05                                  | 0.000                                | 0.42                 | 0.50                  | 1.18                  | 0.00                  | 0.25                | 0.000                 | 0.000                             |
|                               | E02.1.2  | MTM     | 1000                      | 937                 | 1241                                              | 19.50               | 11.38             | 131.6             | 616.0           | 6.7 | 22.9 | 0.54                 | 2.43                               | 2.22                               | 0.00                 | 0.06                                  | 0.000                                | 0.87                 | 0.84                  | 1.71                  | 0.00                  | 0.42                | 0.000                 | 0.001                             |
|                               | E03.1.2  | MTM     | 2000                      | 1853                | 2240                                              | 38.90               | 21.06             | 209.2             | 1246.0          | 6.5 | 23.0 | 0.89                 | 3.97                               | 3.32                               | 0.00                 | 0.06                                  | 0.000                                | 1.58                 | 1.27                  | 3.24                  | 0.00                  | 0.81                | 0.000                 | 0.001                             |

Table S5. Algae periphyton taxa and DRM/ANOVA results. BG=Blue Green Algae (i.e., Cyanobacteria). Ukn=Unknown; ns= not significant; -- = not applicable, and ETD=elapsed time during dosing period. All responses as SpCond  $\mu\text{S}/\text{cm}$ .

| Periphyton algae Taxa1 | Periphyton Division | Rare Taxon?<br>( $\leq 2$<br>occurrences<br>in all<br>samples) | DWB  |                  |                         |                         |            |      |      |                            | MTM  |                  |                         |                         |            |      |      |                            |
|------------------------|---------------------|----------------------------------------------------------------|------|------------------|-------------------------|-------------------------|------------|------|------|----------------------------|------|------------------|-------------------------|-------------------------|------------|------|------|----------------------------|
|                        |                     |                                                                | ETD  | EC <sub>50</sub> | EC <sub>50</sub> _lower | EC <sub>50</sub> _upper | ANOVA_pval | LOEC | NOEC | Effect<br>(+ve or -<br>ve) | ETD  | EC <sub>50</sub> | EC <sub>50</sub> _lower | EC <sub>50</sub> _upper | ANOVA_pval | LOEC | NOEC | Effect<br>(+ve or -<br>ve) |
| <i>Achananthes</i>     | Bacillariophyta     | No                                                             | 8    | 144.5            | 28.48                   | 733.2                   | 0.039808   | 1265 | 798  | +ve                        | 4356 | 953.1            | 384.5                   | 2363                    | 0.107389   | 2307 | 1074 | -ve                        |
| <i>Amphipleura</i>     | Bacillariophyta     | No                                                             | ns   | ns               | ns                      | ns                      | ns         | ns   | ns   | ns                         | 1529 | 617.4            | 522.8                   | 729.1                   | 0.032282   | 1074 | 612  | +ve                        |
| <i>Amphora</i>         | Bacillariophyta     | No                                                             | 15   | 3469             | 3459                    | 3478                    | 8.55E-06   | 3505 | 1543 | +ve                        | ns   | ns               | ns                      | ns                      | ns         | ns   | ns   | ns                         |
| <i>Anabaena</i>        | Cyanophycota        | Yes                                                            | --   | --               | --                      | --                      | --         | --   | --   | --                         | --   | --               | --                      | --                      | --         | --   | --   | --                         |
| <i>Ankistrodesmus</i>  | Chlorophyta         | Yes                                                            | --   | --               | --                      | --                      | --         | --   | --   | --                         | --   | --               | --                      | --                      | --         | --   | --   | --                         |
| BasalCellsBG           | Cyanophycota        | No                                                             | ns   | ns               | ns                      | ns                      | ns         | ns   | ns   | ns                         | 1529 | 2187             | 1987                    | 2408                    | 0.002554   | 2307 | 1074 | +ve                        |
| <i>Chroococcus</i>     | Cyanophycota        | No                                                             | ns   | ns               | ns                      | ns                      | ns         | ns   | ns   | ns                         | ns   | ns               | ns                      | ns                      | ns         | ns   | ns   | ns                         |
| <i>Cladophora</i>      | Chlorophyta         | No                                                             | 43   | 3070             | 2058                    | 4579                    | 0.030965   | 3505 | 1543 | +ve                        | 4356 | 1218             | 913.5                   | 1625                    | 0.00012    | 1074 | 612  | +ve                        |
| <i>Closterium</i>      | Chlorophyta         | Yes                                                            | --   | --               | --                      | --                      | --         | --   | --   | --                         | --   | --               | --                      | --                      | --         | --   | --   | --                         |
| <i>Cocconeis</i>       | Bacillariophyta     | No                                                             | ns   | ns               | ns                      | ns                      | ns         | ns   | ns   | ns                         | 8    | 639.7            | 150.2                   | 2724                    | 0.033402   | 1074 | 612  | +ve                        |
| <i>Compsopogon</i>     | Rhodophyta          | No                                                             | 4356 | 1624             | 1157                    | 2280                    | 0.009234   | 3505 | 1543 | +ve                        | 56   | 1231             | 721                     | 2100                    | 0.039514   | 2307 | 1074 | +ve                        |
| <i>Cosmarium</i>       | Chlorophyta         | Yes                                                            | --   | --               | --                      | --                      | --         | --   | --   | --                         | --   | --               | --                      | --                      | --         | --   | --   | --                         |
| <i>Cyclotella</i>      | Bacillariophyta     | Yes                                                            | --   | --               | --                      | --                      | --         | --   | --   | --                         | --   | --               | --                      | --                      | --         | --   | --   | --                         |
| <i>Cymbella</i>        | Bacillariophyta     | No                                                             | 1529 | 1286             | 1006                    | 1644                    | 0.005512   | 1543 | 1265 | +ve                        | ns   | ns               | ns                      | ns                      | ns         | ns   | ns   | ns                         |
| <i>Fragilaria</i>      | Bacillariophyta     | No                                                             | ns   | ns               | ns                      | ns                      | ns         | ns   | ns   | ns                         | ns   | ns               | ns                      | ns                      | ns         | ns   | ns   | ns                         |
| <i>Gomphonema</i>      | Bacillariophyta     | No                                                             | ns   | ns               | ns                      | ns                      | ns         | ns   | ns   | ns                         | ns   | ns               | ns                      | ns                      | ns         | ns   | ns   | ns                         |
| <i>Gyrosigma</i>       | Bacillariophyta     | No                                                             | ns   | ns               | ns                      | ns                      | ns         | ns   | ns   | ns                         | ns   | ns               | ns                      | ns                      | ns         | ns   | ns   | ns                         |
| <i>Homoeothrix</i>     | Cyanophycota        | No                                                             | ns   | ns               | ns                      | ns                      | ns         | ns   | ns   | ns                         | 4356 | 258.4            | 53.78                   | 1241                    | 0.109616   | 612  | 114  | -ve                        |
| <i>Melosira</i>        | Bacillariophyta     | No                                                             | 15   | 1174             | 938                     | 1470                    | 2.56E-03   | 1265 | 798  | +ve                        | 15   | 1038             | 790.2                   | 1364                    | 0.047153   | 1074 | 612  | +ve                        |
| <i>Merismopedia</i>    | Cyanophycota        | No                                                             | ns   | ns               | ns                      | ns                      | ns         | ns   | ns   | ns                         | ns   | ns               | ns                      | ns                      | ns         | ns   | ns   | ns                         |
| <i>Navicula</i>        | Bacillariophyta     | No                                                             | 15   | 1812             | 1222                    | 2686                    | 1.04E-02   | 3505 | 1543 | +ve                        | 43   | 2233             | 1885                    | 2645                    | 0.04823    | 2307 | 1074 | +ve                        |
| <i>Nitzschia</i>       | Bacillariophyta     | No                                                             | 15   | 1305             | 1151                    | 1479                    | 9.77E-04   | 1543 | 1265 | -ve                        | 15   | 1444             | 316.3                   | 6594                    | 0.002323   | 2307 | 1074 | +ve                        |
| <i>Oedogonium</i>      | Chlorophyta         | Yes                                                            | --   | --               | --                      | --                      | --         | --   | --   | --                         | --   | --               | --                      | --                      | --         | --   | --   | --                         |
| <i>Oscillatoria</i>    | Cyanophycota        | No                                                             | ns   | ns               | ns                      | ns                      | ns         | ns   | ns   | ns                         | 56   | ns               | ns                      | ns                      | ns         | ns   | ns   | ns                         |
| <i>Pediastrum</i>      | Chlorophyta         | Yes                                                            | --   | --               | --                      | --                      | --         | --   | --   | --                         | --   | --               | --                      | --                      | --         | --   | --   | --                         |
| <i>Phormidium</i>      | Cyanophycota        | Yes                                                            | --   | --               | --                      | --                      | --         | --   | --   | --                         | --   | --               | --                      | --                      | --         | --   | --   | --                         |
| <i>Pleurosira</i>      | Bacillariophyta     | Yes                                                            | --   | --               | --                      | --                      | --         | --   | --   | --                         | --   | --               | --                      | --                      | --         | --   | --   | --                         |
| <i>Rhoicosphenia</i>   | Bacillariophyta     | No                                                             | 4356 | 1578             | 1467                    | 1697                    | 0.000181   | 1543 | 1265 | +ve                        | 1529 | 594.6            | 197.7                   | 1788                    | 1.04E-05   | 612  | 114  | +ve                        |
| <i>Scenedesmus</i>     | Chlorophyta         | No                                                             | 8    | 1216             | 760                     | 1946                    | 1.09E-02   | ns   | 3505 | +ve                        | ns   | ns               | ns                      | ns                      | ns         | ns   | ns   | ns                         |
| <i>Sellaphora</i>      | Bacillariophyta     | Yes                                                            | --   | --               | --                      | --                      | --         | --   | --   | --                         | --   | --               | --                      | --                      | --         | --   | --   | --                         |
| <i>Stigeoclonium</i>   | Chlorophyta         | No                                                             | 29   | 1486             | 1073                    | 2058                    | 1.27E-01   | ns   | 3505 | +ve                        | ns   | ns               | ns                      | ns                      | ns         | ns   | ns   | ns                         |
| <i>Surirella</i>       | Bacillariophyta     | No                                                             | ns   | ns               | ns                      | ns                      | ns         | ns   | ns   | ns                         | ns   | ns               | ns                      | ns                      | ns         | ns   | ns   | ns                         |
| <i>Synedra</i>         | Bacillariophyta     | No                                                             | 15   | 924              | 532                     | 1606                    | 2.35E-02   | 1543 | 1265 | +ve                        | 1529 | 606.6            | 574.9                   | 640.1                   | 0.017719   | 612  | 114  | +ve                        |
| <i>Tryblionella</i>    | Bacillariophyta     | No                                                             | ns   | ns               | ns                      | ns                      | ns         | ns   | ns   | ns                         | 15   | 1084             | 338.5                   | 3469                    | 0.1077     | 2307 | 1074 | +ve                        |
| UknColonialCoccoidBG   | Cyanophycota        | Yes                                                            | --   | --               | --                      | --                      | --         | --   | --   | --                         | --   | --               | --                      | --                      | --         | --   | --   | --                         |
| UknFilamentousBG       | Cyanophycota        | No                                                             | ns   | ns               | ns                      | ns                      | ns         | ns   | ns   | ns                         | ns   | ns               | ns                      | ns                      | ns         | ns   | ns   | ns                         |
| UknFilamentousGreen    | Chlorophyta         | Yes                                                            | --   | --               | --                      | --                      | --         | --   | --   | --                         | --   | --               | --                      | --                      | --         | --   | --   | --                         |
|                        | Cyanophycota        | Yes                                                            | 4356 | 809.2            | 630.6                   | 1039                    | 0.12232    | NA   | 3505 | +ve                        | 1529 | 133.6            | 28.03                   | 636.5                   | 0.016687   | 612  | 114  | +ve                        |

Table S6. Taxa identified and enumerated in gravel and drift samples. Ukn=unknown.

| Taxon_Base            | Gravel Occurrences | Rare Gravel Taxon (≤2 Instances, All Samples) | Drift Occurrences | Rare Drift Taxon (≤2 Instances, All Samples) | Taxon_1           | Taxon_2       | Major_Groups  | Common names                                 |
|-----------------------|--------------------|-----------------------------------------------|-------------------|----------------------------------------------|-------------------|---------------|---------------|----------------------------------------------|
| Anisoptera            | 1                  | Yes                                           | 1                 | Yes                                          | Anisoptera        | Odonata       | Other Insects | dragonfly (Infracorder)                      |
| Antocha               | 5                  | No                                            | 1                 | Yes                                          | Limonidae         | Diptera       | Other Insects | crane fly (Limonidae)                        |
| Baetidae              | 71                 | No                                            | 80                | No                                           | Baetidae          | Ephemeroptera | EPT Insects   | small minnow mayfly (family)                 |
| Berosus               | 6                  | No                                            | 1                 | Yes                                          | Hydrophilidae     | Coleoptera    | Other Insects | water scavenger beetle (Hydrophilidae)       |
| Brachycentridae       | 0                  | Yes                                           | 1                 | Yes                                          | Brachycentridae   | Trichoptera   | EPT Insects   | humpless casemaker caddisfly (family)        |
| Brachycera            | 1                  | Yes                                           | 0                 | Yes                                          | Brachycera        | Diptera       | Other Insects | Brachyceran fly (Suborder)                   |
| Caenis                | 14                 | No                                            | 24                | No                                           | Caenidae          | Ephemeroptera | EPT Insects   | mayfly (Caenidae)                            |
| Calopteryx            | 1                  | Yes                                           | 0                 | Yes                                          | Calopterygidae    | Odonata       | Other Insects | damselfly (Calopterygidae)                   |
| Ceratopogonidae       | 12                 | No                                            | 8                 | No                                           | Ceratopogonidae   | Diptera       | Chironomids   | biting midge (family)                        |
| Ceratopsyche          | 85                 | No                                            | 24                | No                                           | Hydropsychidae    | Trichoptera   | EPT Insects   | net-spinning caddisfly (Hydropsychidae)      |
| Cheumatopsyche        | 94                 | No                                            | 31                | No                                           | Hydropsychidae    | Trichoptera   | EPT Insects   | net-spinning caddisfly (Hydropsychidae)      |
| Chimarra              | 76                 | No                                            | 15                | No                                           | Philopotamidae    | Trichoptera   | EPT Insects   | finger-net caddisfly (Philopotamidae)        |
| Chironomini           | 85                 | No                                            | 85                | No                                           | Chironomidae      | Chironomidae  | Chironomids   | non-biting midge (tribe)                     |
| Cladocera             | 16                 | No                                            | 26                | No                                           | Diplostrota       | Crustacea     | Crustaceans   | water flea (Class- Brachiopoda)              |
| Coenagrionidae        | 68                 | No                                            | 14                | No                                           | Coenagrionidae    | Odonata       | Other Insects | damselfly (family)                           |
| Copepoda              | 85                 | No                                            | 62                | No                                           | Copepoda          | Crustacea     | Crustaceans   | copepod (Subclass)                           |
| Corbicula             | 64                 | No                                            | 2                 | Yes                                          | Cyrenidae         | Bivalvia      | Bivalves      | asian clam (Cyrenidae)                       |
| Corydalus cornutus    | 4                  | Yes                                           | 1                 | Yes                                          | Corydalidae       | Megaloptera   | Other Insects | dobsonfly (Corydalidae)                      |
| Crangonyx             | 1                  | Yes                                           | 1                 | Yes                                          | Crangonyctidae    | Crustacea     | Crustaceans   | amphipoda (Crangonyctidae)                   |
| Dolichopodidae        | 1                  | Yes                                           | 1                 | Yes                                          | Dolichopodidae    | Diptera       | Other Insects | long-legged fly (family)                     |
| Elmidae               | 99                 | No                                            | 31                | No                                           | Elmidae           | Coleoptera    | Other Insects | riffle beetle (family)                       |
| Empididae             | 11                 | No                                            | 2                 | Yes                                          | Empididae         | Diptera       | Other Insects | dance fly (family)                           |
| Ferrissia             | 46                 | No                                            | 24                | No                                           | Planorbidae       | Gastropoda    | Gastropods    | limpet (Planorbidae)                         |
| Fossaria              | 5                  | No                                            | 10                | No                                           | Lymnaeidae        | Gastropoda    | Gastropods    | snail -air breathing (Lymnaeidae)            |
| Gerridae              | 1                  | Yes                                           | 5                 | Yes                                          | Gerridae          | Hemiptera     | Other Insects | water strider (family)                       |
| Glossosomatidae       | 1                  | Yes                                           | 0                 | Yes                                          | Glossosomatidae   | Trichoptera   | EPT Insects   | saddle-case maker caddisfly (family)         |
| Helicopsyche borealis | 18                 | No                                            | 7                 | No                                           | Helicopsychidae   | Trichoptera   | EPT Insects   | caddisfly -speckled peter (Helicopsychidae)  |
| Heptageniidae         | 66                 | No                                            | 28                | No                                           | Heptageniidae     | Ephemeroptera | EPT Insects   | flat-headed mayfly (family)                  |
| Hetaerina americana   | 1                  | Yes                                           | 0                 | Yes                                          | Calopterygidae    | Odonata       | Other Insects | american rubyspot damselfly (Calopterygidae) |
| Hydra                 | 12                 | No                                            | 8                 | No                                           | Hydridae          | Anthoathecata | Other         | Hydridae (family)                            |
| Hydropsychidae        | 44                 | No                                            | 14                | No                                           | Hydropsychidae    | Trichoptera   | EPT Insects   | net-spinning caddisfly (family)              |
| Hydroptila            | 43                 | No                                            | 64                | No                                           | Hydroptilidae     | Trichoptera   | EPT Insects   | microcaddisfly (Hydroptilidae)               |
| Leptoceridae          | 4                  | No                                            | 26                | No                                           | Leptoceridae      | Trichoptera   | EPT Insects   | long-horned caddisfly (family)               |
| Leptophlebiidae       | 3                  | Yes                                           | 1                 | Yes                                          | Leptophlebiidae   | Ephemeroptera | EPT Insects   | prong-gilled mayfly (family)                 |
| Leuctra               | 1                  | Yes                                           | 0                 | Yes                                          | Leuctridae        | Plecoptera    | EPT Insects   | rolled-winged stonefly (Leuctridae)          |
| Lirceus               | 5                  | No                                            | 0                 | Yes                                          | Asellidae         | Crustacea     | Crustaceans   | isopod (Asellidae)                           |
| Lutrochus             | 1                  | Yes                                           | 0                 | Yes                                          | Lutrochidae       | Coleoptera    | Other Insects | water beetle (Lutrochidae)                   |
| Menetus               | 10                 | No                                            | 21                | No                                           | Planorbidae       | Gastropoda    | Gastropods    | ram's horn snail (Planorbidae)               |
| Mooreobdella          | 4                  | No                                            | 0                 | Yes                                          | Erpobdellidae     | Worm          | Worms         | Leech - Annelida (Erpobdellidae)             |
| Naididae              | 96                 | No                                            | 99                | No                                           | Naididae          | Worm          | Worms         | Worm- Annelida (family)                      |
| Nematoda              | 59                 | No                                            | 18                | No                                           | Nematoda          | Worm          | Worms         | roundworms (Phylum)                          |
| Neureclipsis          | 7                  | No                                            | 0                 | Yes                                          | Polycentropodidae | Trichoptera   | EPT Insects   | tube maker caddisfly (Polycentropodidae)     |
| Oecetis               | 7                  | No                                            | 7                 | Yes                                          | Leptoceridae      | Trichoptera   | EPT Insects   | long-horned caddisfly (Leptoceridae)         |
| Orconectes            | 0                  | Yes                                           | 1                 | Yes                                          | Cambaridae        | Crustacea     | Crustaceans   | crayfish (Cambaridae)                        |
| Orthocladinae         | 75                 | No                                            | 78                | No                                           | Chironomidae      | Chironomidae  | Chironomids   | non-biting midge, orthoclads (Chironomidae)  |
| Ostracoda             | 68                 | No                                            | 63                | No                                           | Ostracoda         | Crustacea     | Crustaceans   | seed shrimp (class)                          |
| Pericoma              | 0                  | Yes                                           | 1                 | Yes                                          | Psychodidae       | Diptera       | Other Insects | moth fly (Psychodidae)                       |
| Perlidae              | 16                 | No                                            | 0                 | Yes                                          | Perlidae          | Plecoptera    | EPT Insects   | common stonefly (family)                     |
| Perlodidae            | 1                  | Yes                                           | 0                 | Yes                                          | Perlodidae        | Plecoptera    | EPT Insects   | stripetail stonefly (family)                 |
| Petrophila            | 1                  | Yes                                           | 1                 | Yes                                          | Crambidae         | Lepidoptera   | Other Insects | grass moth (Crambidae)                       |
| Physa                 | 79                 | No                                            | 78                | No                                           | Physidae          | Gastropoda    | Gastropods    | left-handed snail, air-breathing (Physidae)  |
| Planorbidae           | 28                 | No                                            | 20                | No                                           | Planorbidae       | Gastropoda    | Gastropods    | ram's horn snail, air-breathing (family)     |
| Pleidae               | 2                  | Yes                                           | 0                 | Yes                                          | Pleidae           | Hemiptera     | Other Insects | pygmy backswimmer (family)                   |
| Pleuroceridae         | 29                 | No                                            | 1                 | Yes                                          | Pleuroceridae     | Gastropoda    | Gastropods    | pleurocerid, gilled snail (family)           |
| Polycentropodidae     | 5                  | Yes                                           | 0                 | Yes                                          | Polycentropodidae | Trichoptera   | EPT Insects   | trumpet-net caddisfly (family)               |
| Prostoma              | 28                 | No                                            | 1                 | Yes                                          | Tetrastemmatidae  | Worm          | Worms         | proboscis worm (Tetrastemmatidae)            |
| Psephenus herricki    | 57                 | No                                            | 9                 | Yes                                          | Psephenidae       | Coleoptera    | Other Insects | water penny beetle (Psephenidae)             |
| Pseudochironomus      | 0                  | Yes                                           | 1                 | Yes                                          | Chironomidae      | Chironomidae  | Chironomids   | non-biting midge (Chironomidae)              |
| Psychoda              | 0                  | Yes                                           | 1                 | Yes                                          | Psychodidae       | Diptera       | Other Insects | moth fly (Psychodidae)                       |
| Simulium              | 19                 | No                                            | 17                | No                                           | Simuliidae        | Diptera       | Other Insects | black fly (Simuliidae)                       |
| Sphaeriidae           | 12                 | No                                            | 1                 | Yes                                          | Sphaeriidae       | Bivalvia      | Bivalves      | finger nail clam (family)                    |
| Stenelmis             | 112                | No                                            | 56                | No                                           | Elmidae           | Coleoptera    | Other Insects | riffle beetle (Elmidae)                      |
| Synurella             | 1                  | Yes                                           | 1                 | Yes                                          | Crangonyctidae    | Crustacea     | Crustaceans   | amphipoda (Crangonyctidae)                   |
| Tanytarsinae          | 88                 | No                                            | 83                | No                                           | Chironomidae      | Chironomidae  | Chironomids   | non-biting midge (Chironomidae)              |
| Tanytarsini           | 107                | No                                            | 119               | No                                           | Chironomidae      | Chironomidae  | Chironomids   | non-biting midge (Chironomidae)              |
| Tricorythodes         | 91                 | No                                            | 46                | No                                           | Leptohyphidae     | Ephemeroptera | EPT Insects   | little stout crawler mayfly (Leptohyphidae)  |
| Turbellaria           | 55                 | No                                            | 23                | No                                           | Turbellaria       | Worm          | Worms         | flatworm (class)                             |
| Ukn Chironomidae      | 35                 | No                                            | 90                | No                                           | Chironomidae      | Chironomidae  | Chironomids   | non-biting midge (family)                    |
| Ukn Diptera           | 0                  | Yes                                           | 5                 | No                                           | Diptera           | Diptera       | Other Insects | fly (order)                                  |
| Ukn Ephemeroptera     | 7                  | No                                            | 53                | No                                           | Ephemeroptera     | Ephemeroptera | EPT Insects   | mayfly (order)                               |
| Ukn Gastropoda        | 3                  | Yes                                           | 2                 | Yes                                          | Gastropoda        | Gastropoda    | Gastropods    | snails (class)                               |
| Ukn Plecoptera        | 0                  | Yes                                           | 1                 | Yes                                          | Plecoptera        | Plecoptera    | EPT Insects   | stonefly (order)                             |
| Ukn Trichoptera       | 2                  | Yes                                           | 24                | No                                           | Trichoptera       | Trichoptera   | EPT Insects   | caddisfly (order)                            |

Table S7: Rank ordering of invertebrate taxa-level responses comprising SpCond RSDs.

| Taxon                      | ETD | EC <sub>50</sub> | EC <sub>50</sub> _lower | EC <sub>50</sub> _upper | ANOVA_pval | LOEC | NOEC | Effect (+ve or -ve) |
|----------------------------|-----|------------------|-------------------------|-------------------------|------------|------|------|---------------------|
| <b>DWB-Gravel</b>          |     |                  |                         |                         |            |      |      |                     |
| <i>Prostoma</i>            | 29  | 348              | 295                     | 410.33                  | 0.0000     | 798  | 114  | -ve                 |
| Other Insects              | 2   | 760              | 221                     | 2616.4                  | 0.0906     | 1265 | 798  | -ve                 |
| Crustacea                  | 56  | 833              | 432                     | 1604.9                  | 0.0694     | 1265 | 798  | +ve                 |
| Copepoda                   | 56  | 836              | 286                     | 2441.7                  | 0.0601     | 1265 | 798  | +ve                 |
| Orthocladinae              | 43  | 953              | 108                     | 8375.2                  | 0.0149     | 1543 | 1265 | -ve                 |
| Heptageniidae              | 856 | 1331             | 575                     | 3083.1                  | 0.0404     | 1543 | 1265 | -ve                 |
| Turbellaria                | 856 | 1465             | 1115                    | 1925.4                  | 0.0931     | 3505 | 1543 | +ve                 |
| Naididae                   | 856 | 1555             | 1241                    | 1948                    | 0.0481     | 798  | 114  | -ve                 |
| <i>Physa</i>               | 43  | 1613             | 1000                    | 2600.8                  | 0.1292     | ns   | 3505 | +ve                 |
| <b>DWB-Drift/Emergence</b> |     |                  |                         |                         |            |      |      |                     |
| Ostracoda                  | 56  | 742              | 432                     | 1276.1                  | 0.0161     | 1265 | 798  | -ve                 |
| Drift_EPT                  | 856 | 815              | 414                     | 1607.9                  | 0.0391     | 1265 | 798  | +ve                 |
| Turbellaria                | 856 | 877              | 215                     | 3579.3                  | 0.1172     | ns   | 3505 | +ve                 |
| Emerge_Trichoptera         | 23  | 883              | 190                     | 4113.2                  | 0.0102     | 3505 | 1543 | +ve                 |
| Emerge-Chironomids         | 57  | 905              | 359                     | 2278.2                  | 0.0228     | 1543 | 1265 | +ve                 |
| Other Insects              | 856 | 970              | 356                     | 2641.9                  | 0.1680     | ns   | 3505 | +ve                 |
| Copepoda                   | 43  | 1153             | 563                     | 2361.7                  | 0.1526     | ns   | 3505 | +ve                 |
| Coenagrionidae             | 856 | 1285             | 1046                    | 1577.1                  | 0.1211     | ns   | 3505 | +ve                 |
| Drift_Chironomidae         | 8   | 1304             | 738                     | 2305.7                  | 0.0348     | 1543 | 1265 | -ve                 |
| Emerge_Ephemeroptera       | 957 | 1537             | 1426                    | 1656.3                  | 0.0003     | 1265 | 798  | -ve                 |
| <i>Physa</i>               | 56  | 1568             | 1520                    | 1617.6                  | 0.0005     | 3505 | 1543 | +ve                 |
| Ukn Ephemeroptera          | 8   | 1646             | 1293                    | 2095.3                  | 0.0008     | 3505 | 1543 | +ve                 |

Table S7 continued.

| Taxon                      | ETD | EC <sub>50</sub> | EC <sub>50</sub> _lower | EC <sub>50</sub> _upper | ANOVA_pval | LOEC | NOEC | Effect (+ve or -ve) |
|----------------------------|-----|------------------|-------------------------|-------------------------|------------|------|------|---------------------|
| <b>MTM-Gravel</b>          |     |                  |                         |                         |            |      |      |                     |
| <i>Fossaria</i>            | 43  | 310.9711         | 258.9478                | 373.446                 | 3.24E-62   | 612  | 114  | -ve                 |
| Menetus                    | 56  | 540.2493         | 32.54503                | 8968.17                 | 0.013189   | 612  | 114  | -ve                 |
| Hydropsychidae             | 29  | 585.7057         | 120.0335                | 2857.962                | 0.003037   | 612  | 114  | +ve                 |
| <i>Hydroptila</i>          | 2   | 597.1813         | 130.7847                | 2726.815                | 0.147599   | ns   | 2307 | +ve                 |
| <i>Ceratopsyche</i>        | 43  | 611.9992         | 459.8064                | 814.5668                | 0.281268   | ns   | 2307 | -ve                 |
| Tanytarsini                | 29  | 620.4003         | 180.769                 | 2129.218                | 0.042767   | 1074 | 612  | -ve                 |
| <i>Tricorythodes</i>       | 29  | 633.3675         | 220.8825                | 1816.144                | 0.090089   | 1074 | 612  | +ve                 |
| Trichoptera                | 56  | 690.5903         | 141.7602                | 3364.238                | 0.047065   | 2307 | 1074 | -ve                 |
| Crustacea                  | 29  | 771.6133         | 448.4444                | 1327.672                | 0.011872   | 1074 | 612  | -ve                 |
| Copepoda                   | 29  | 982.209          | 202.559                 | 4762.733                | 0.007242   | 612  | 114  | -ve                 |
| Elimidae                   | 56  | 1008.295         | 282.2021                | 3602.594                | 0.066392   | 2307 | 1074 | -ve                 |
| Turbellaria                | 56  | 1026.023         | 330.6944                | 3183.371                | 0.06782    | 2307 | 1074 | -ve                 |
| Orthocladinae              | 2   | 1093.699         | 504.6005                | 2370.542                | 0.0629     | ns   | 2307 | +ve                 |
| <b>MTM Drift/Emergence</b> |     |                  |                         |                         |            |      |      |                     |
| Emerge_Trichoptera         | 43  | 299.7355         | 28.59747                | 3141.584                | 0.00657    | 612  | 114  | -ve                 |
| Drift_Planorbidae          | 43  | 310.9711         | 258.9478                | 373.446                 | 3.24E-62   | 612  | 114  | -ve                 |
| Emerge-Chironomids         | 37  | 456.6114         | 168.9795                | 1233.842                | 0.001524   | 612  | 114  | -ve                 |
| Menetus                    | 43  | 611.9995         | 501.6726                | 746.5892                | 1.21E-01   | ns   | 2307 | -ve                 |
| <i>Hydroptila</i>          | 43  | 611.9999         | 528.9019                | 708.1537                | 0.049895   | 1074 | 612  | -ve                 |
| <i>Tricorythodes</i>       | 22  | 614.881          | 167.212                 | 2261.074                | 0.029979   | 1074 | 612  | +ve                 |
| Copepoda                   | 856 | 628.4351         | 267.3289                | 1477.321                | 0.007898   | 1074 | 612  | +ve                 |
| <i>Chimarra</i>            | 856 | 643.2093         | 266.5282                | 1552.25                 | 0.049093   | 1074 | 612  | +ve                 |
| Emerge_Ephemeroptera       | 37  | 863.83           | 199.6786                | 3737.017                | 0.008612   | 612  | 114  | -ve                 |
| <i>Physa</i>               | 856 | 869.5122         | 518.7413                | 1457.473                | 0.011411   | 1074 | 612  | +ve                 |
| Drift_Chironomidae         | 2   | 1050.841         | 465.1452                | 2374.028                | 0.062451   | NA   | 2307 | +ve                 |
| Ostracoda                  | 22  | 1095.554         | 238.9483                | 5023.009                | 0.01297    | 612  | 114  | -ve                 |
| Naididae                   | 15  | 1097.146         | 434.6123                | 2769.665                | 0.125549   | NA   | 2307 | -ve                 |
| Chironomini                | 2   | 1109.225         | 383.1313                | 3211.379                | 0.11861    | NA   | 2307 | +ve                 |
| Coleoptera                 | 29  | 1575.269         | 1497.764                | 1656.784                | 7.07E-48   | 2307 | 1074 | +ve                 |
| <i>Ceratopsyche</i>        | 8   | 1589.675         | 1527.227                | 1654.677                | 6.4E-63    | 2307 | 1074 | +ve                 |

Table S8: Community and system Level measures modeled. Bray= Bray-Curtis distance measure, MDS1=Axis 1 scores from nonmetric multidimensional scaling, RDA1=Axis1 scores from redundancy analysis, and Sum=Summed over all sampling events after dosing begins. Other abbreviations are defined in main text.

| Community-level Response                             | System-level Response                      |
|------------------------------------------------------|--------------------------------------------|
| DriftCommunity_Mgroup_brayDistance                   | AFDM (Periphyton Ash Free Dry Mass)        |
| DriftCommunity_Mgroup_RA_brayDistance                | Chla (Periphyton Chlorophyll)              |
| DriftCommunity_Mgroup_RA_RDA1_bray                   | TotalBP (Periphyton Dry Weight)            |
| DriftCommunity_Mgroup_RA_RDA2_bray                   | OM (Periphyton organic content, %)         |
| DriftCommunity_Mgroup_RDA1_bray                      | DeadDiatoms                                |
| DriftCommunity_Mgroup_RDA2_bray                      | Drift_Sum_Total                            |
| DriftCommunity_Taxa1_brayDistance                    | Drift_Total                                |
| DriftCommunity_Taxa1_RA_brayDistance                 | DriftCommunity_Mgroup_Sum_brayDistance     |
| DriftCommunity_Taxa1_RA_RDA1_bray                    | DriftCommunity_Mgroup_Sum_RA_brayDistance  |
| DriftCommunity_Taxa1_RA_RDA2_bray                    | DriftCommunity_Mgroup_Sum_RA_RDA1_bray     |
| DriftCommunity_Taxa1_RDA1_bray                       | DriftCommunity_Mgroup_Sum_RA_RDA2_bray     |
| DriftCommunity_Taxa1_RDA2_bray                       | DriftCommunity_Mgroup_Sum_RDA1_bray        |
| EmergeCommunity_Mgroup_brayDistance                  | DriftCommunity_Mgroup_Sum_RDA2_bray        |
| EmergeCommunity_Mgroup_RA_brayDistance               | DriftCommunity_Taxa1_Sum_brayDistance      |
| EmergeCommunity_Mgroup_RA_RDA1_bray                  | DriftCommunity_Taxa1_Sum_RA_brayDistance   |
| EmergeCommunity_Mgroup_RA_RDA2_bray                  | DriftCommunity_Taxa1_Sum_RA_RDA1_bray      |
| EmergeCommunity_Mgroup_RDA1_bray                     | DriftCommunity_Taxa1_Sum_RA_RDA2_bray      |
| EmergeCommunity_Mgroup_RDA2_bray                     | DriftCommunity_Taxa1_Sum_RDA1_bray         |
| GravelCommunity_Mgroup_brayDistance                  | DriftCommunity_Taxa1_Sum_RDA2_bray         |
| GravelCommunity_Mgroup_RA_brayDistance               | Emerge_Sum_Total                           |
| GravelCommunity_Mgroup_RA_RDA1_bray                  | Emerge_Total                               |
| GravelCommunity_Mgroup_RA_RDA2_bray                  | EmergeCommunity_Mgroup_Sum_brayDistance    |
| GravelCommunity_Mgroup_RDA1_bray                     | EmergeCommunity_Mgroup_Sum_RA_brayDistance |
| GravelCommunity_Mgroup_RDA2_bray                     | EmergeCommunity_Mgroup_Sum_RA_RDA1_bray    |
| GravelCommunity_Taxa1_brayDistance                   | EmergeCommunity_Mgroup_Sum_RA_RDA2_bray    |
| GravelCommunity_Taxa1_RA_brayDistance                | EmergeCommunity_Mgroup_Sum_RDA1_bray       |
| GravelCommunity_Taxa1_RA_RDA1_bray                   | EmergeCommunity_Mgroup_Sum_RDA2_bray       |
| GravelCommunity_Taxa1_RA_RDA2_bray                   | Gravel_Sum_Total                           |
| GravelCommunity_Taxa1_RDA1_bray                      | Gravel_Total                               |
| GravelCommunity_Taxa1_RDA2_bray                      | GravelCommunity_Mgroup_Sum_brayDistance    |
| PalmerAlgaeCommunity_Div_BD_brayDistance             | GravelCommunity_Mgroup_Sum_RA_brayDistance |
| PalmerAlgaeCommunity_Div_BD_Halves_brayDistance      | GravelCommunity_Mgroup_Sum_RA_RDA1_bray    |
| PalmerAlgaeCommunity_Div_BD_Halves_RA_brayDistance   | GravelCommunity_Mgroup_Sum_RA_RDA2_bray    |
| PalmerAlgaeCommunity_Div_BD_Halves_RA_RDA1_bray      | GravelCommunity_Mgroup_Sum_RDA1_bray       |
| PalmerAlgaeCommunity_Div_BD_Halves_RA_RDA2_bray      | GravelCommunity_Mgroup_Sum_RDA2_bray       |
| PalmerAlgaeCommunity_Div_BD_Halves_RDA1_bray         | GravelCommunity_Taxa1_Sum_brayDistance     |
| PalmerAlgaeCommunity_Div_BD_Halves_RDA2_bray         | GravelCommunity_Taxa1_Sum_RA_brayDistance  |
| PalmerAlgaeCommunity_Div_BD_RA_brayDistance          | GravelCommunity_Taxa1_Sum_RA_RDA1_bray     |
| PalmerAlgaeCommunity_Div_BD_RA_RDA1_bray             | GravelCommunity_Taxa1_Sum_RA_RDA2_bray     |
| PalmerAlgaeCommunity_Div_BD_RA_RDA2_bray             | GravelCommunity_Taxa1_Sum_RDA1_bray        |
| PalmerAlgaeCommunity_Div_BD_RDA1_bray                | GravelCommunity_Taxa1_Sum_RDA2_bray        |
| PalmerAlgaeCommunity_Div_BD_RDA2_bray                |                                            |
| PalmerAlgaeCommunity_Div_CD_brayDistance             |                                            |
| PalmerAlgaeCommunity_Div_CD_Halves_brayDistance      |                                            |
| PalmerAlgaeCommunity_Div_CD_Halves_RA_brayDistance   |                                            |
| PalmerAlgaeCommunity_Div_CD_Halves_RA_RDA1_bray      |                                            |
| PalmerAlgaeCommunity_Div_CD_Halves_RA_RDA2_bray      |                                            |
| PalmerAlgaeCommunity_Div_CD_Halves_RDA1_bray         |                                            |
| PalmerAlgaeCommunity_Div_CD_Halves_RDA2_bray         |                                            |
| PalmerAlgaeCommunity_Div_CD_RA_brayDistance          |                                            |
| PalmerAlgaeCommunity_Div_CD_RA_RDA1_bray             |                                            |
| PalmerAlgaeCommunity_Div_CD_RA_RDA2_bray             |                                            |
| PalmerAlgaeCommunity_Div_CD_RDA1_bray                |                                            |
| PalmerAlgaeCommunity_Div_CD_RDA2_bray                |                                            |
| PalmerAlgaeCommunity_Taxa1_BD_brayDistance           |                                            |
| PalmerAlgaeCommunity_Taxa1_BD_Halves_brayDistance    |                                            |
| PalmerAlgaeCommunity_Taxa1_BD_Halves_RA_brayDistance |                                            |
| PalmerAlgaeCommunity_Taxa1_BD_Halves_RA_RDA1_bray    |                                            |
| PalmerAlgaeCommunity_Taxa1_BD_Halves_RA_RDA2_bray    |                                            |
| PalmerAlgaeCommunity_Taxa1_BD_Halves_RDA1_bray       |                                            |
| PalmerAlgaeCommunity_Taxa1_BD_Halves_RDA2_bray       |                                            |
| PalmerAlgaeCommunity_Taxa1_BD_RA_brayDistance        |                                            |
| PalmerAlgaeCommunity_Taxa1_BD_RA_RDA1_bray           |                                            |
| PalmerAlgaeCommunity_Taxa1_BD_RA_RDA2_bray           |                                            |
| PalmerAlgaeCommunity_Taxa1_BD_RDA1_bray              |                                            |
| PalmerAlgaeCommunity_Taxa1_BD_RDA2_bray              |                                            |
| PalmerAlgaeCommunity_Taxa1_CD_brayDistance           |                                            |
| PalmerAlgaeCommunity_Taxa1_CD_Halves_brayDistance    |                                            |
| PalmerAlgaeCommunity_Taxa1_CD_Halves_RA_brayDistance |                                            |
| PalmerAlgaeCommunity_Taxa1_CD_Halves_RA_RDA1_bray    |                                            |
| PalmerAlgaeCommunity_Taxa1_CD_Halves_RA_RDA2_bray    |                                            |
| PalmerAlgaeCommunity_Taxa1_CD_Halves_RDA1_bray       |                                            |
| PalmerAlgaeCommunity_Taxa1_CD_Halves_RDA2_bray       |                                            |
| PalmerAlgaeCommunity_Taxa1_CD_RA_brayDistance        |                                            |
| PalmerAlgaeCommunity_Taxa1_CD_RA_RDA1_bray           |                                            |
| PalmerAlgaeCommunity_Taxa1_CD_RA_RDA2_bray           |                                            |
| PalmerAlgaeCommunity_Taxa1_CD_RDA1_bray              |                                            |
| PalmerAlgaeCommunity_Taxa1_CD_RDA2_bray              |                                            |

Table S9: Rank order of EC<sub>50</sub> community level measures used in RSD. Bray= Bray-Curtis Distance Measure, RDA1=Axis1 scores from redundancy analysis, and Sum=Summed over all sampling events after dosing begins. Other abbreviations are defined in main text.

| Community-level Response                             | ETD  | EC <sub>50</sub> | EC <sub>50</sub> _lower | EC <sub>50</sub> _upper | ANOVA_pval | LOEC | NOEC |
|------------------------------------------------------|------|------------------|-------------------------|-------------------------|------------|------|------|
| <b>DWB</b>                                           |      |                  |                         |                         |            |      |      |
| PalmerAlgaeCommunity_Taxa1_BD_RDA1_bray              | 56   | 599.2143         | 187.7255                | 1912.674                | 0.010912   | 798  | 114  |
| PalmerAlgaeCommunity_Taxa1_CD_RDA1_bray              | 56   | 751.3518         | 355.2692                | 1589.019                | 0.001985   | 798  | 114  |
| GravelCommunity_Mgroup_RA_RDA1_bray                  | 2    | 755.3934         | 213.1884                | 2676.596                | 0.011095   | 1265 | 798  |
| PalmerAlgaeCommunity_Taxa1_BD_RDA1_bray              | 29   | 982.6889         | 569.2335                | 1696.452                | 0.069264   | 1543 | 1265 |
| EmergeCommunity_Mgroup_RA_RDA1_bray                  | 23   | 999.4701         | 512.4594                | 1949.307                | 0.010985   | 1265 | 798  |
| PalmerAlgaeCommunity_Div_CD_Halves_RA_RDA1_bray      | 1529 | 1128.987         | 738.0862                | 1726.915                | 0.007276   | 1543 | 1265 |
| GravelCommunity_Taxa1_brayDistance                   | 29   | 1134.023         | 564.6562                | 2277.505                | 0.037238   | 1265 | 798  |
| PalmerAlgaeCommunity_Div_BD_RA_brayDistance          | 15   | 1140.06          | 612.8154                | 2120.925                | 0.015887   | 798  | 114  |
| EmergeCommunity_Mgroup_RA_brayDistance               | 16   | 1187.599         | 713.2198                | 1977.498                | 0.006018   | 798  | 114  |
| PalmerAlgaeCommunity_Taxa1_BD_Halves_RA_brayDistance | 1529 | 1242.535         | 1056.854                | 1460.84                 | 0.006424   | 798  | 114  |
| EmergeCommunity_Mgroup_RA_RDA2_bray                  | 37   | 1259.225         | 1158.029                | 1369.265                | 0.0216     | 1543 | 1265 |
| PalmerAlgaeCommunity_Taxa1_CD_RA_brayDistance        | 15   | 1277.057         | 1158.945                | 1407.206                | 0.001903   | 798  | 114  |
| DriftCommunity_Taxa1_RA_brayDistance                 | 56   | 1286.845         | 849.6957                | 1948.899                | 0.094428   | 3505 | 1543 |
| PalmerAlgaeCommunity_Taxa1_CD_RDA2_bray              | 29   | 1323.56          | 1159.616                | 1510.682                | 0.001751   | 1543 | 1265 |
| PalmerAlgaeCommunity_Div_BD_RA_brayDistance          | 56   | 1361.882         | 1233.718                | 1503.36                 | 0.000414   | 1265 | 798  |
| PalmerAlgaeCommunity_Taxa1_CD_RA_RDA2_bray           | 8    | 1382.862         | 1198.934                | 1595.007                | 0.008249   | 1543 | 1265 |
| EmergeCommunity_Mgroup_RA_brayDistance               | 30   | 1527.762         | 1209.078                | 1930.445                | 0.011282   | 798  | 114  |
| PalmerAlgaeCommunity_Taxa1_BD_RDA2_bray              | 15   | 1537.853         | 1398.371                | 1691.247                | 0.03574    | 3505 | 1543 |
| DriftCommunity_Mgroup_brayDistance                   | 56   | 1555.225         | 1255.468                | 1926.551                | 0.03057    | 1265 | 798  |
| EmergeCommunity_Mgroup_RDA1_bray                     | 43   | 1556.953         | 1439.176                | 1684.367                | 0.00134    | 3505 | 1543 |
| PalmerAlgaeCommunity_Div_CD_brayDistance             | 56   | 1567.008         | 1082.845                | 2267.65                 | 0.010218   | 1543 | 1265 |
| GravelCommunity_Taxa1_brayDistance                   | 43   | 1604.559         | 1205.155                | 2136.329                | 0.014414   | 1543 | 1265 |
| GravelCommunity_Mgroup_RA_RDA1_bray                  | 29   | 1619.186         | 795.4485                | 3295.954                | 0.016102   | 3505 | 1543 |
| DriftCommunity_Mgroup_RDA2_bray                      | 43   | 2178.795         | 876.4661                | 5416.237                | 0.012789   | 3505 | 1543 |
| <b>MTM</b>                                           |      |                  |                         |                         |            |      |      |
| GravelCommunity_Mgroup_RA_RDA2_bray                  | 56   | 556.2375         | 80.20551                | 3857.593                | 0.025115   | 612  | 114  |
| PalmerAlgaeCommunity_Div_BD_RA_RDA1_bray             | 56   | 587.158          | 471.2469                | 731.5793                | 0.00222    | 612  | 114  |
| EmergeCommunity_Mgroup_RA_RDA1_bray                  | 16   | 616.0894         | 540.5876                | 702.1362                | 0.058422   | 1074 | 612  |
| GravelCommunity_Taxa1_RA_RDA2_bray                   | 56   | 657.5516         | 399.2231                | 1083.039                | 0.020965   | 1074 | 612  |
| PalmerAlgaeCommunity_Taxa1_CD_RDA1_bray              | 56   | 674.1751         | 477.0711                | 952.7134                | 0.001474   | 612  | 114  |
| PalmerAlgaeCommunity_Taxa1_BD_RDA1_bray              | 56   | 746.0674         | 543.19                  | 1024.718                | 0.002215   | 612  | 114  |
| DriftCommunity_Taxa1_RDA2_bray                       | 29   | 775.7756         | 136.5578                | 4407.129                | 0.099393   | 2307 | 1074 |
| GravelCommunity_Taxa1_RDA2_bray                      | 29   | 867.8985         | 468.5276                | 1607.691                | 0.015917   | 1074 | 612  |
| PalmerAlgaeCommunity_Div_CD_RDA2_bray                | 56   | 1041.183         | 461.8856                | 2347.034                | 0.006603   | 612  | 114  |
| EmergeCommunity_Mgroup_RDA1_bray                     | 23   | 1052.648         | 291.4533                | 3801.868                | 0.031338   | 1074 | 612  |
| PalmerAlgaeCommunity_Div_CD_RA_RDA1_bray             | 43   | 1056.809         | 412.0622                | 2710.381                | 0.024141   | 612  | 114  |
| DriftCommunity_Taxa1_RA_RDA2_bray                    | 43   | 1065.09          | 765.9983                | 1480.964                | 0.01298    | 2307 | 1074 |
| GravelCommunity_Taxa1_RDA1_bray                      | 43   | 1072.329         | 610.5126                | 1883.482                | 0.09288    | 2307 | 1074 |
| PalmerAlgaeCommunity_Taxa1_CD_RDA2_bray              | 15   | 1077.934         | 661.287                 | 1757.091                | 0.06556    | NA   | 2307 |
| DriftCommunity_Mgroup_RA_RDA2_bray                   | 43   | 1083.729         | 677.8648                | 1732.601                | 0.024548   | 2307 | 1074 |
| EmergeCommunity_Mgroup_RDA1_bray                     | 37   | 1099.934         | 406.733                 | 2974.569                | 0.001711   | 612  | 114  |
| GravelCommunity_Mgroup_RA_RDA2_bray                  | 15   | 1100.509         | 373.5922                | 3241.821                | 0.012178   | 612  | 114  |
| DriftCommunity_Taxa1_RDA1_bray                       | 2    | 1103.997         | 569.2081                | 2141.238                | 0.00425    | 612  | 114  |
| DriftCommunity_Taxa1_RDA2_bray                       | 15   | 1131.562         | 397.4081                | 3221.961                | 0.042448   | 2307 | 1074 |
| PalmerAlgaeCommunity_Div_BD_RA_RDA1_bray             | 43   | 1197.58          | 357.9805                | 4006.36                 | 0.080867   | 2307 | 1074 |
| PalmerAlgaeCommunity_Taxa1_BD_RDA2_bray              | 43   | 1327.934         | 890.6888                | 1979.825                | 0.000114   | 612  | 114  |
| DriftCommunity_Mgroup_RA_RDA2_bray                   | 29   | 1360.526         | 470.0729                | 3937.755                | 0.013661   | 2307 | 1074 |
| EmergeCommunity_Mgroup_RDA1_bray                     | 30   | 1369.95          | 450.1112                | 4169.553                | 0.01585    | 2307 | 1074 |

Table S10: Rank order of EC<sub>50</sub> system Level measures used in RSD. Bray= Bray-Curtis Distance Measure, MDS1= RDA1/2=Axis1/2 scores from redundancy analysis, and Sum=Summed over all sampling events after dosing begins. Other abbreviations are defined in main text.

| System-level Response                   | ETD  | EC <sub>50</sub> | EC <sub>50</sub><br>lower | EC <sub>50</sub><br>upper | ANOVA_<br>pval | LOEC | NOEC |
|-----------------------------------------|------|------------------|---------------------------|---------------------------|----------------|------|------|
| <b>DWB</b>                              |      |                  |                           |                           |                |      |      |
| DriftCommunity_Taxa1_Sum_RDA1_bray      | 856  | 780.4385481      | 196.8095                  | 3094.791                  | 0.0240224      | 1543 | 1265 |
| OM (Periphyton organic content, %)      | 15   | 826.1573305      | 336.1654                  | 2030.358                  | 0.0047039      | 1265 | 798  |
| DeadDiatoms                             | 15   | 877.9492151      | 507.347                   | 1519.266                  | 0.0246981      | 1543 | 1265 |
| Emerge_Total                            | 57   | 890.5666958      | 517.0206                  | 1533.999                  | 0.0051312      | 1265 | 798  |
| AFDM (Periphyton Ash Free Dry Mass)     | 15   | 1033.917231      | 684.6852                  | 1561.279                  | 0.0243556      | 1543 | 1265 |
| Ave_OM                                  | 4356 | 1273.705855      | 1113.739                  | 1456.649                  | 0.0532101      | NA   | 3505 |
| Emerge_Total                            | 43   | 1455.082308      | 1067.541                  | 1983.31                   | 0.0390334      | NA   | 3505 |
| GravelCommunity_Mgroup_Sum_RA_RDA2_bray | 856  | 1477.877164      | 886.5241                  | 2463.691                  | 0.00245        | 798  | 114  |
| TotalBP (Periphyton Dry Weight)         | 15   | 1557.029517      | 1441.735                  | 1681.544                  | 0.0047239      | 3505 | 1543 |
| GravelCommunity_Taxa1_Sum_RA_RDA1_bray  | 856  | 1606.218881      | 1078.983                  | 2391.085                  | 0.000523       | 798  | 114  |
| EmergeCommunity_Mgroup_Sum_brayDistance | 957  | 1617.686392      | 980.6421                  | 2668.567                  | 0.0128011      | 1543 | 1265 |
| Chla (Periphyton Chlorophyll)           | 4356 | 1620.578053      | 1065.838                  | 2464.045                  | 0.0003648      | 798  | 114  |
| Drift_Total                             | 56   | 1692.653058      | 644.8153                  | 4443.248                  | 0.0206436      | 3505 | 1543 |
| <b>MTM</b>                              |      |                  |                           |                           |                |      |      |
| Drift_Total                             | 22   | 355.8513648      | 28.94474                  | 4374.895                  | 2.18E-03       | 612  | 114  |
| Emerge_Sum_Total                        | 957  | 437.454934       | 65.37209                  | 2927.348                  | 0.0043628      | 612  | 114  |
| Emerge_Total                            | 37   | 459.2617966      | 155.8627                  | 1353.251                  | 0.0017455      | 612  | 114  |
| GravelCommunity_Taxa1_Sum_RDA1_bray     | 856  | 512.8102267      | 84.96645                  | 3095.037                  | 0.0008569      | 612  | 114  |
| EmergeCommunity_Mgroup_Sum_RA_RDA1_bray | 957  | 555.0780317      | 168.2684                  | 1831.072                  | 0.0034249      | 612  | 114  |
| AFDM (Periphyton Ash Free Dry Mass)     | 1529 | 572.8924869      | 80.73202                  | 4065.373                  | 0.0059468      | 612  | 114  |
| Emerge_Total                            | 16   | 605.6249135      | 150.8561                  | 2431.333                  | 0.0407376      | 1074 | 612  |
| TotalBP                                 | 2    | 613.3016791      | 443.4295                  | 848.2497                  | 0.0277831      | 1074 | 612  |
| Emerge_Total                            | 30   | 667.1517541      | 141.6382                  | 3142.452                  | 0.0026337      | 612  | 114  |
| OM (Periphyton organic content, %)      | 29   | 883.50588        | 657.5539                  | 1187.101                  | 0.0007306      | 612  | 114  |
| Emerge_Total                            | 23   | 949.5244055      | 405.8624                  | 2221.434                  | 0.0335795      | 1074 | 612  |
| Chla (Periphyton Chlorophyll)           | 1529 | 956.5418621      | 293.1926                  | 3120.721                  | 0.0636126      | 2307 | 1074 |
| Drift_Total                             | 2    | 1065.543739      | 686.3337                  | 1654.273                  | 0.0447         | 2307 | 1074 |
| Gravel_Total                            | 56   | 1071.995764      | 723.5831                  | 1588.173                  | 0.1856877      | NA   | 2307 |
| DriftCommunity_Taxa1_Sum_RA_RDA1_bray   | 856  | 1101.836558      | 700.5867                  | 1732.896                  | 0.0020471      | 1074 | 612  |
| DriftCommunity_Mgroup_Sum_RA_RDA1_bray  | 856  | 1131.934639      | 690.0058                  | 1856.906                  | 0.0029318      | 1074 | 612  |
| TotalBP (Periphyton Dry Weight)         | 1529 | 1273.66012       | 872.8017                  | 1858.624                  | 0.0002201      | 612  | 114  |

Table S11. Hazard concentrations estimated at the 5<sup>th</sup>, 10<sup>th</sup>, and 20<sup>th</sup> percentiles of respective RSDs with 95% confidence intervals based on best fit distribution function by recipe and level of ecological organization. All results are based on fits of gamma distribution function except Log logistic was used for DWB Taxa-level SpCond and IS, and lognormal was selected for MTM System level IS. Best fits based on log likelihood.

| RSD             | HCx   | SpCond ( $\mu\text{S}/\text{cm}$ ) |                | IS (mM)               |                         |
|-----------------|-------|------------------------------------|----------------|-----------------------|-------------------------|
|                 |       | DWB                                | MTM            | DWB                   | MTM                     |
| Taxa-level      | HC_5  | 561 (440, 710)                     | 308 (230, 412) | 7.149 (5.896, 8.659)  | 3.540 (2.087, 6.028)    |
|                 | HC_10 | 679 (558, 823)                     | 392 (310, 500) | 8.270 (7.096, 9.719)  | 5.107 (3.377, 7.839)    |
|                 | HC_20 | 835 (711, 977)                     | 514 (426, 625) | 9.686 (8.573, 11.050) | 7.629 (5.489, 10.742)   |
| Community-Level | HC_5  | 777 (646, 934)                     | 603 (507, 734) | 7.660 (6.432, 9.277)  | 10.302 (8.392, 13.116)  |
|                 | HC_10 | 870 (742, 1018)                    | 673 (576, 797) | 8.566 (7.361, 10.098) | 11.678 (9.768, 14.277)  |
|                 | HC_20 | 993 (872, 1132)                    | 764 (678, 883) | 9.760 (8.571, 11.152) | 13.509 (11.624, 15.926) |
| System-Level    | HC_5  | 763 (577, 997)                     | 372 (271, 527) | 7.564 (5.801, 10.079) | 7.012 (5.301, 10.352)   |
|                 | HC_10 | 857 (676, 1073)                    | 439 (338, 589) | 8.476 (6.807, 10.726) | 8.412 (6.499, 11.813)   |
|                 | HC_20 | 982 (808, 1184)                    | 531 (427, 676) | 9.679 (8.110, 11.785) | 10.487 (8.284, 13.995)  |

Table S12. PRC analyses' taxa loading (in parentheses) ranked largest to smallest. Loadings correspond with taxa effects plotted on secondary y-axes in Figures 7, S2 and S3.

| Periphtic Algae_DWB   | Periphytic Algae_MTM     | Gravel Invertebrates_DWB   | Gravel Invertebrates_MTM   | Drift Invertebrates_DWB   | Drift Invertebrates_MTM        | Emergence_DWB           | Emergence_MTM          |
|-----------------------|--------------------------|----------------------------|----------------------------|---------------------------|--------------------------------|-------------------------|------------------------|
| Melosira (0.724)      | Melosira (0.563)         | Tanvtarsini (0.501)        | Phvsa (0.487)              | Tanvtarsini (0.4493)      | Phvsa (1.1047)                 | OtherInsect (-0.0048)   | Chironomids (1.2532)   |
| Cocconeis (0.574)     | Oscillatoria (0.414)     | Phvsa (0.381)              | Stenelmis (0.296)          | Copepoda (0.302)          | Elmidae (0.1677)               | Diptera (-0.1131)       | Ephemeroptera (0.8594) |
| Rhoicosphenia (0.347) | Cocconeis (0.371)        | Corbicula (0.144)          | Copepoda (0.156)           | Phvsa (0.2944)            | Copepoda (0.1512)              | Trichoptera (-0.3918)   | Trichoptera (0.8473)   |
| Navicula (0.226)      | Rhoicosphenia (0.277)    | Tanypodinae (0.101)        | Cheumatopsyche (0.121)     | Ukn Chironomidae (0.2072) | Chironomini (0.1225)           | Chironomids (-0.7573)   | Diptera (0.0352)       |
| Synedra (0.206)       | Synedra (0.197)          | Stenelmis (0.074)          | Tricorythodes (0.1)        | Tanypodinae (0.1581)      | Turbellaria (0.1172)           | Ephemeroptera (-1.2541) | OtherInsect (0)        |
| Amphora (0.094)       | Navicula (0.164)         | Hydropsychidae (0.066)     | Elmidae (0.098)            | Chironomini (0.093)       | Ukn Ephemeroptera              |                         |                        |
| UknFilamentousBG      | Amphora (0.049)          | Chironomini (0.043)        | Hydra (0.091)              | Ukn Trichoptera (0.074)   | Ukn Trichoptera (0.0829)       |                         |                        |
| Oscillatoria (0.071)  | Gomphonema (0.045)       | Elmidae (0.042)            | Coenagrionidae (0.069)     | Elmidae (0.0721)          | Tanypodinae (0.0766)           |                         |                        |
| Cymbella (0.056)      | Cymbella (0.044)         | Pleuroceridae (0.041)      | Corbicula (0.064)          | Hydroptila (0.0559)       | Stenelmis (0.0759)             |                         |                        |
| Gomphonema (0.056)    | Homoeothrix (0.029)      | Chimarra (0.04)            | Psephenus (0.041)          | Ukn Ephemeroptera (0.051) | Ceratopsyche (0.0674)          |                         |                        |
| Homoeothrix (0.054)   | UknFilamentousBG (0.020) | Ukn Chironomidae (0.04)    | Lirceus (0.036)            | Ceratopsyche (0.0336)     | Cheumatopsyche (0.0521)        |                         |                        |
| Gyrosigma (0.049)     | Nitzschia (0.018)        | Coenagrionidae (0.025)     | Caenis (0.032)             | Nematoda (0.0308)         | Ukn Chironomidae (0.0467)      |                         |                        |
| Stigeoclonium (0.027) | Stigeoclonium (0.014)    | Turbellaria (0.022)        | Perlidae (0.032)           | Stenelmis (0.0265)        | Heptageniidae (0.0428)         |                         |                        |
| Nitzschia (0.023)     | Achnanthes (0.011)       | Cheumatopsyche (0.017)     | Ceratopogonidae (0.032)    | Caenis (0.0176)           | Orthoclaeniidae (0.0364)       |                         |                        |
| Achnanthes (0.016)    | Fragilaria (0.005)       | Hydroptila (0.01)          | Petrophila (0.024)         | Baetidae (0.0135)         | Coenagrionidae (0.0291)        |                         |                        |
| Tryblionella (0.005)  | BasalCellsBG (0.003)     | Tricorythodes (0.009)      | Nematoda (0.022)           | Ukn Diptera (0.0126)      | Hydropsychidae (0.0209)        |                         |                        |
| Scenedesmus (0.003)   | Scenedesmus (0.000)      | Nematoda (0.007)           | Antocha (0.019)            | Hydropsychidae (0.0124)   | Helicopsyche borealis (0.0191) |                         |                        |
| BasalCellsBG (0.002)  | Merismopedia (-0.0003)   | Oecetis (0.004)            | Oecetis (0.012)            | Ceratopogonidae (0.0062)  | Simulium (0.0174)              |                         |                        |
| Fragilaria (0.0007)   | Chroococcus (-0.0004)    | Mooreobdella (0.001)       | Neureclipsis (0.007)       | Heptageniidae (0.0004)    | Chimarra (0.0171)              |                         |                        |
| Chroococcus (0.0002)  | Surirella (-0.001)       | Hydra (0.001)              | Ukn Chironomidae (0.005)   | Pleidae (0)               | Ukn Diptera (0.0158)           |                         |                        |
| Merismopedia (0.0002) | Tryblionella (-0.005)    | Petrophila (0)             | Cladocera (0.002)          | Turbellaria (-0.0053)     | Caenis (0.0098)                |                         |                        |
| Surirella (-0.0003)   | Gyrosigma (-0.012)       | Neureclipsis (-0.003)      | Berosus (0)                | Coenagrionidae (-0.0063)  | Nematoda (0.0098)              |                         |                        |
| Amphipleura (-0.003)  | Amphipleura (-0.015)     | Ceratopogonidae (-0.004)   | Helicopsyche (-0.004)      | Helicopsyche borealis (-  | Baetidae (0.0092)              |                         |                        |
| Compsopogon (-0.643)  | Cladophora (-0.438)      | Antocha (-0.006)           | Ukn Ephemeroptera (-0.008) | Tricorythodes (-0.0082)   | Tricorythodes (0.0043)         |                         |                        |
| Cladophora (-1.159)   | Compsopogon (-1.247)     | Simulium (-0.006)          | Empididae (-0.01)          | Simulium (-0.0106)        | Hydra (0.0041)                 |                         |                        |
|                       |                          | Empididae (-0.007)         | Tanypodinae (-0.011)       | Leptoceridae (-0.0156)    | Pleidae (0)                    |                         |                        |
|                       |                          | Lirceus (-0.007)           | Simulium (-0.015)          | Chimarra (-0.0232)        | Leptoceridae (-0.002)          |                         |                        |
|                       |                          | Perlidae (-0.01)           | Sphaeriidae (-0.015)       | Cheumatopsyche (-0.0239)  | Ceratopogonidae (-0.0039)      |                         |                        |
|                       |                          | Caenis (-0.011)            | Mooreobdella (-0.017)      | Cladocera (-0.0261)       | Fossaria (-0.0079)             |                         |                        |
|                       |                          | Berosus (-0.012)           | Ceratopsyche (-0.029)      | Fossaria (-0.0265)        | Hydroptila (-0.0129)           |                         |                        |
|                       |                          | Ukn Ephemeroptera (-0.013) | Pleuroceridae (-0.034)     | Hydra (-0.0355)           | Planorbidae (-0.0202)          |                         |                        |
|                       |                          | Sphaeriidae (-0.017)       | Fossaria (-0.037)          | Planorbidae (-0.0431)     | Ferrissia (-0.0356)            |                         |                        |
|                       |                          | Baetidae (-0.02)           | Chimarra (-0.039)          | Menetus (-0.0527)         | Tanytarsini (-0.0389)          |                         |                        |
|                       |                          | Helicopsyche (-0.024)      | Leptoceridae (-0.043)      | Ferrissia (-0.0681)       | Menetus (-0.039)               |                         |                        |
|                       |                          | Cladocera (-0.027)         | Heptageniidae (-0.044)     | Orthoclaeniidae (-0.0735) | Cladocera (-0.0774)            |                         |                        |
|                       |                          | Psephenus (-0.029)         | Tanytarsini (-0.044)       | Ostracoda (-0.1759)       | Ostracoda (-0.1523)            |                         |                        |
|                       |                          | Leptoceridae (-0.029)      | Baetidae (-0.05)           | Naididae (-0.9519)        | Naididae (-1.2248)             |                         |                        |
|                       |                          | Fossaria (-0.037)          | Orthoclaeniidae (-0.051)   |                           |                                |                         |                        |
|                       |                          | Planorbidae (-0.043)       | Hydropsychidae (-0.054)    |                           |                                |                         |                        |
|                       |                          | Menetus (-0.043)           | Hydroptila (-0.067)        |                           |                                |                         |                        |
|                       |                          | Heptageniidae (-0.066)     | Chironomini (-0.072)       |                           |                                |                         |                        |
|                       |                          | Copepoda (-0.093)          | Planorbidae (-0.076)       |                           |                                |                         |                        |
|                       |                          | Ceratopsyche (-0.116)      | Menetus (-0.096)           |                           |                                |                         |                        |
|                       |                          | Orthoclaeniidae (-0.131)   | Prostoma (-0.123)          |                           |                                |                         |                        |
|                       |                          | Prostoma (-0.142)          | Turbellaria (-0.211)       |                           |                                |                         |                        |
|                       |                          | Ostracoda (-0.162)         | Ferrissia (-0.306)         |                           |                                |                         |                        |
|                       |                          | Ferrissia (-0.229)         | Ostracoda (-0.316)         |                           |                                |                         |                        |
|                       |                          | Naididae (-0.899)          | Naididae (-0.801)          |                           |                                |                         |                        |

Table S13. HC<sub>x</sub> equivalences estimated based on the observed ionic composition of each of the dosed recipes.

| RSD                  | HCx                     | SpCond (μS/cm) |     | IS (mM) |       | TDS (mg/l) |     | Cl <sup>-</sup> (mg/l) |      | SO <sub>4</sub> <sup>2-</sup> (mg/l) |       | HCO <sub>3</sub> <sup>-</sup> (mg/l) |       | Ca <sup>2+</sup> (mg/l) |       | Na <sup>+</sup> (mg/l) |       | Mg <sup>2+</sup> (mg/l) |       |
|----------------------|-------------------------|----------------|-----|---------|-------|------------|-----|------------------------|------|--------------------------------------|-------|--------------------------------------|-------|-------------------------|-------|------------------------|-------|-------------------------|-------|
|                      |                         | DWB            | MTM | DWB     | MTM   | DWB        | MTM | DWB                    | MTM  | DWB                                  | MTM   | DWB                                  | MTM   | DWB                     | MTM   | DWB                    | MTM   | DWB                     | MTM   |
| Taxa-level           | HC_5                    | 561            | 308 | 7.14    | 3.54  | 364        | 196 | 115                    | 15.6 | 8.83                                 | 55.9  | 55.02                                | 65.84 | 27.59                   | 23.99 | 43.26                  | 11.18 | 5.82                    | 11.01 |
|                      | HC_10                   | 679            | 392 | 8.27    | 5.10  | 444        | 264 | 147                    | 19.0 | 8.80                                 | 93.1  | 55.02                                | 70.15 | 33.13                   | 25.21 | 55.59                  | 14.43 | 6.36                    | 16.27 |
|                      | HC_20                   | 835            | 514 | 9.68    | 7.62  | 550        | 362 | 191                    | 23.6 | 8.80                                 | 147.1 | 55.02                                | 76.41 | 40.46                   | 26.97 | 71.89                  | 18.13 | 7.08                    | 25.39 |
| Community-Level      | HC_5                    | 777            | 603 | 7.66    | 10.3  | 511        | 433 | 174                    | 26.7 | 8.79                                 | 186.5 | 55.02                                | 80.98 | 37.74                   | 28.25 | 65.83                  | 20.18 | 6.81                    | 33.05 |
|                      | HC_10                   | 870            | 673 | 8.56    | 11.6  | 574        | 490 | 200                    | 29.1 | 8.80                                 | 217.5 | 55.02                                | 84.58 | 42.10                   | 29.26 | 75.55                  | 21.47 | 7.24                    | 39.62 |
|                      | HC_20                   | 993            | 764 | 9.76    | 13.5  | 658        | 563 | 235                    | 32.0 | 8.80                                 | 257.8 | 55.02                                | 89.25 | 47.88                   | 30.57 | 88.40                  | 22.80 | 7.80                    | 48.81 |
| System-Level         | HC_5                    | 763            | 372 | 7.56    | 7.01  | 501        | 247 | 171                    | 18.2 | 8.81                                 | 84.3  | 55.02                                | 69.13 | 37.08                   | 24.92 | 64.37                  | 13.71 | 6.75                    | 14.93 |
|                      | HC_10                   | 857            | 439 | 8.47    | 8.41  | 565        | 302 | 197                    | 20.8 | 8.80                                 | 113.9 | 55.02                                | 72.57 | 41.49                   | 25.88 | 74.19                  | 15.99 | 7.18                    | 19.58 |
|                      | HC_20                   | 982            | 531 | 9.67    | 10.4  | 650        | 376 | 232                    | 24.2 | 8.80                                 | 154.6 | 55.02                                | 77.29 | 47.37                   | 27.21 | 87.25                  | 18.56 | 7.75                    | 26.79 |
| Single-Species Tests | Lowest EC <sub>50</sub> | 1098           | 683 | 10.72   | 12.56 | 729        | 498 | 265                    | 29.4 | 8.77                                 | 221.9 | 55.02                                | 85.09 | 52.81                   | 29.40 | 99.37                  | 21.63 | 8.28                    | 40.60 |
|                      | Low LOEC                | 883            | 479 | 9.00    | 8.00  | 583        | 334 | 204                    | 22.3 | 8.79                                 | 131.6 | 55.02                                | 74.62 | 42.72                   | 26.46 | 76.91                  | 17.18 | 7.30                    | 22.60 |

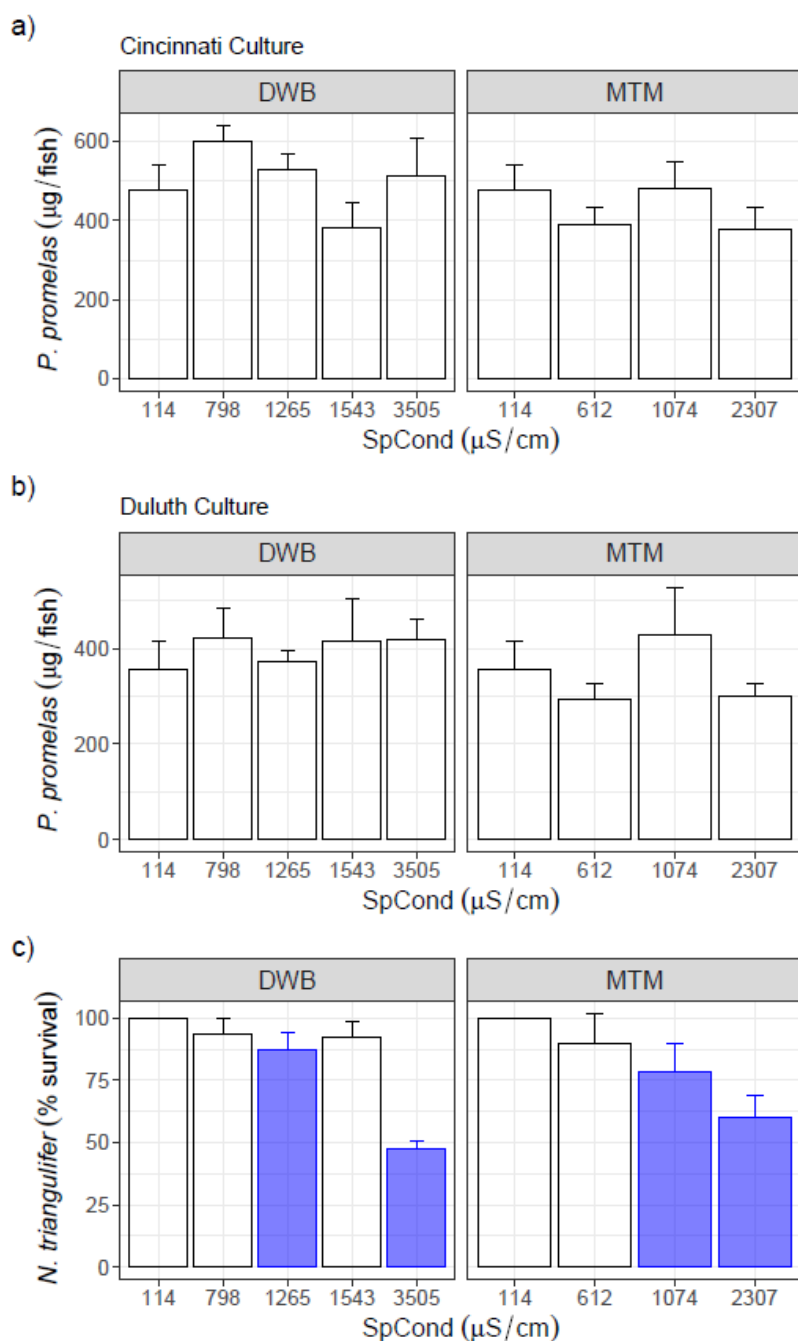

Figure S1. Single-Species ex situ tests. Growth rate responses for *P. promelas* from Cincinnati(a) and Duluth (b) cultures. And *N. trianguifer* % survival results (c). Colored bars denote significant difference from control ( $p < 0.05$ ). N=four per dose.



Figure S2. PRC results in the graphs in the left column plot the same data as shown in Figure 7, main text for the periphytic algae (**a**, **c**) and gravel invertebrate communities (**e**, **g**). In the right column are bar graphs of dominant taxa relative abundance (**b**, **d**, **f**, and **h**), i.e., one example of taxa dominance distributions across doses from one of the sampling dates during the experiment, and when the permutation tests provided evidence for at least one difference in the RDA axis among the different doses on the day sampled (asterisks in plots in the left column). Relative rankings of taxa loadings on secondary y-axis (See Table 12). ETD = elapsed days since dosing began. Taxa less than 5% of RA were

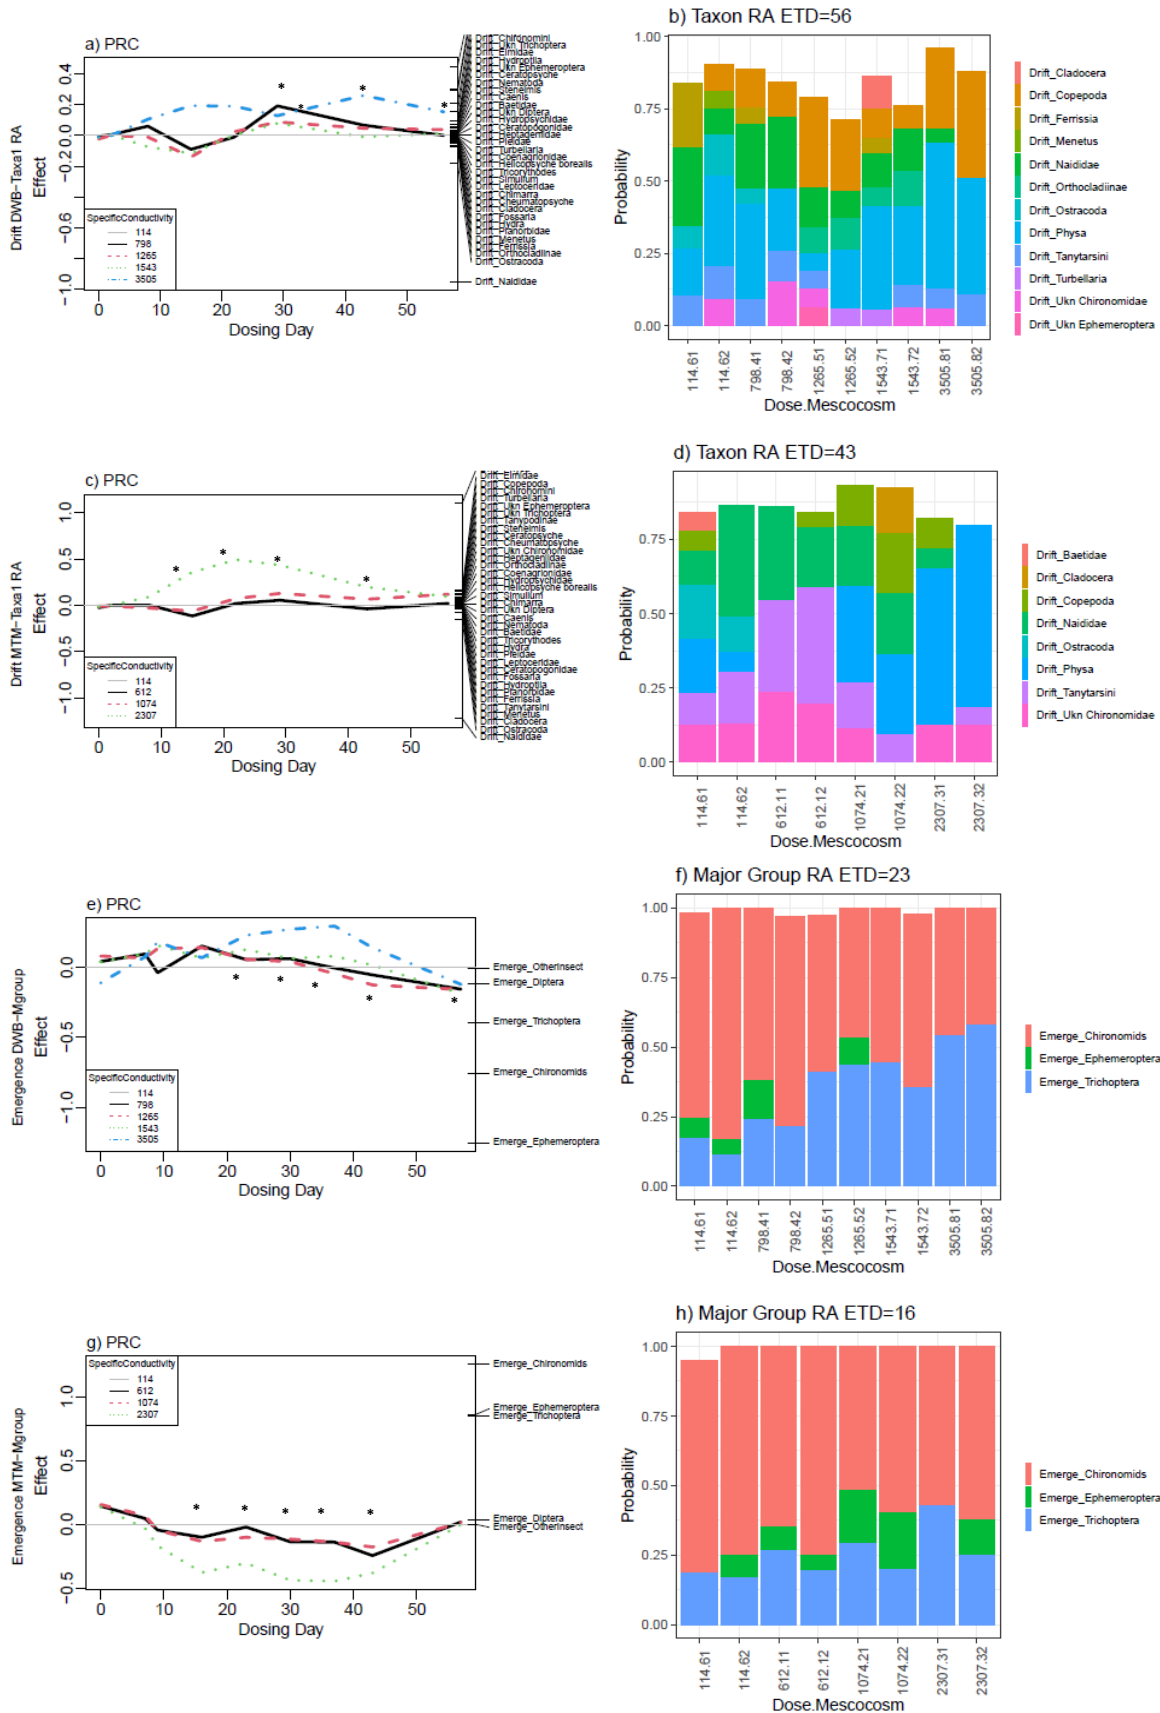

Figure S3. PRCs for community-level measures of drift and emergence for DWB and MTM recipes in the left column of graphs: DWB and MTM drift (**a** and **c**, respectively) and emergence (**e** and **g**, respectively). Examples of dominant taxa abundance distributions plotted as bar graphs in right column (**b**, **d**, **f** and **h**). Content and treatment of data same as in Figure S2.

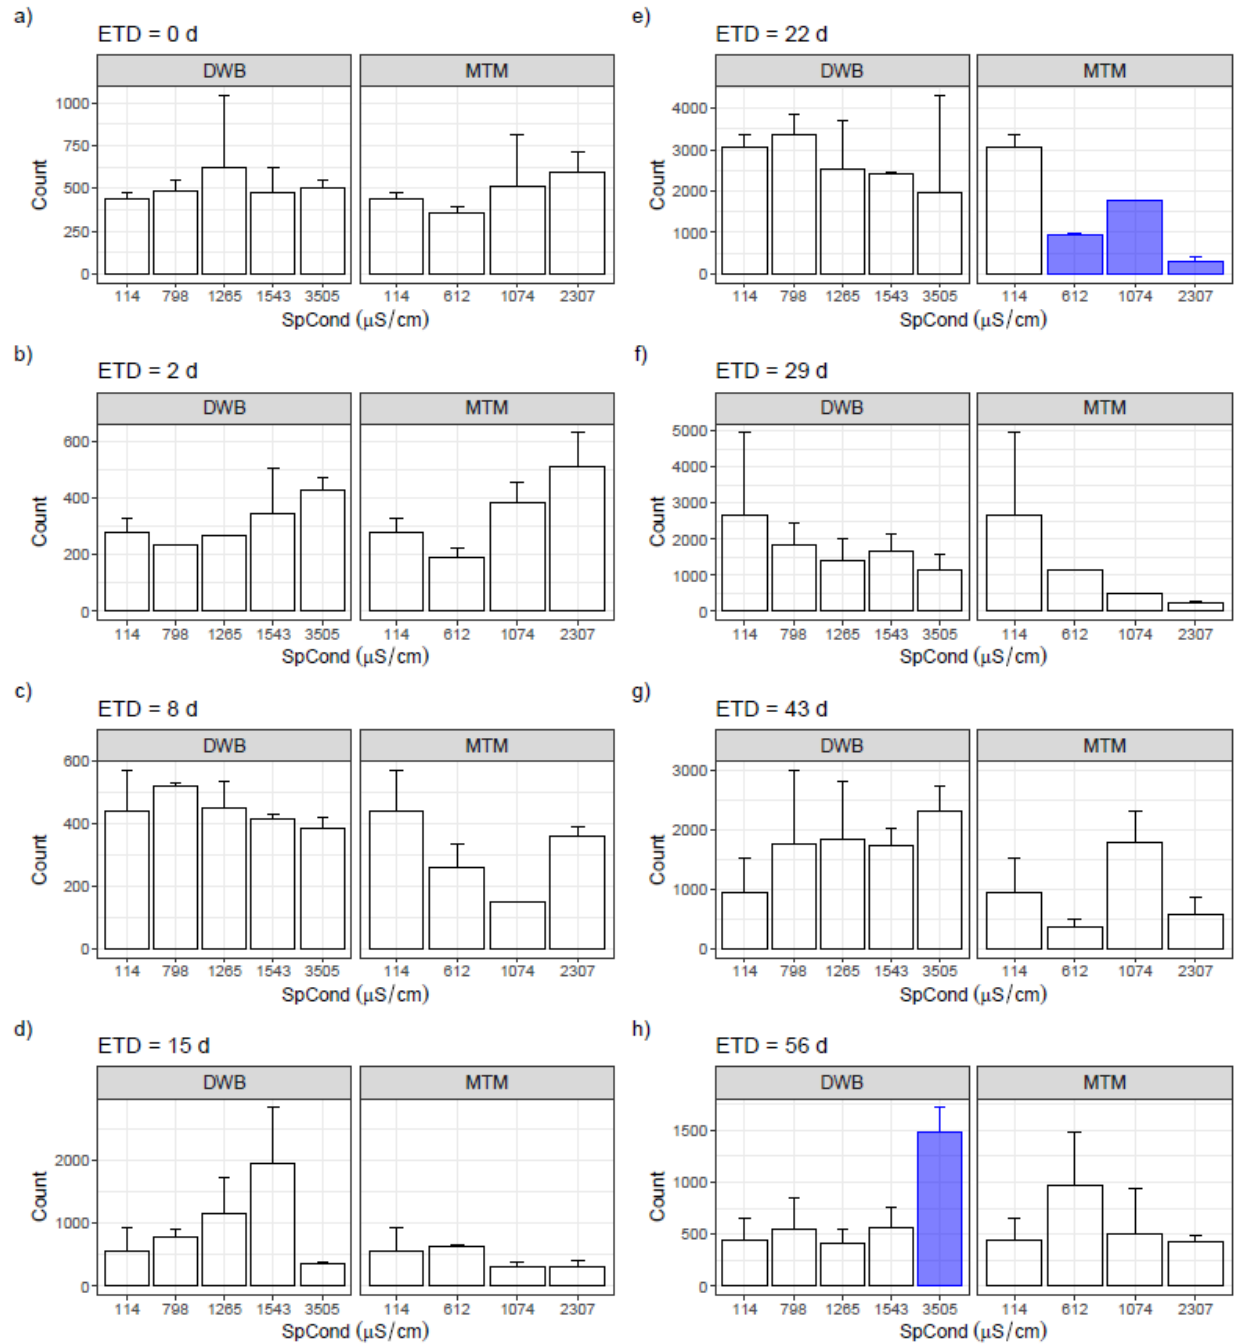

Figure S4. Drifting invertebrate results (total count) collected at different time points, graphs **a – h**. Colored bars denote significant difference from control ( $p < 0.05$ ). N=two per dose. ETD = 2 is equivalent to 24hr drift collection.

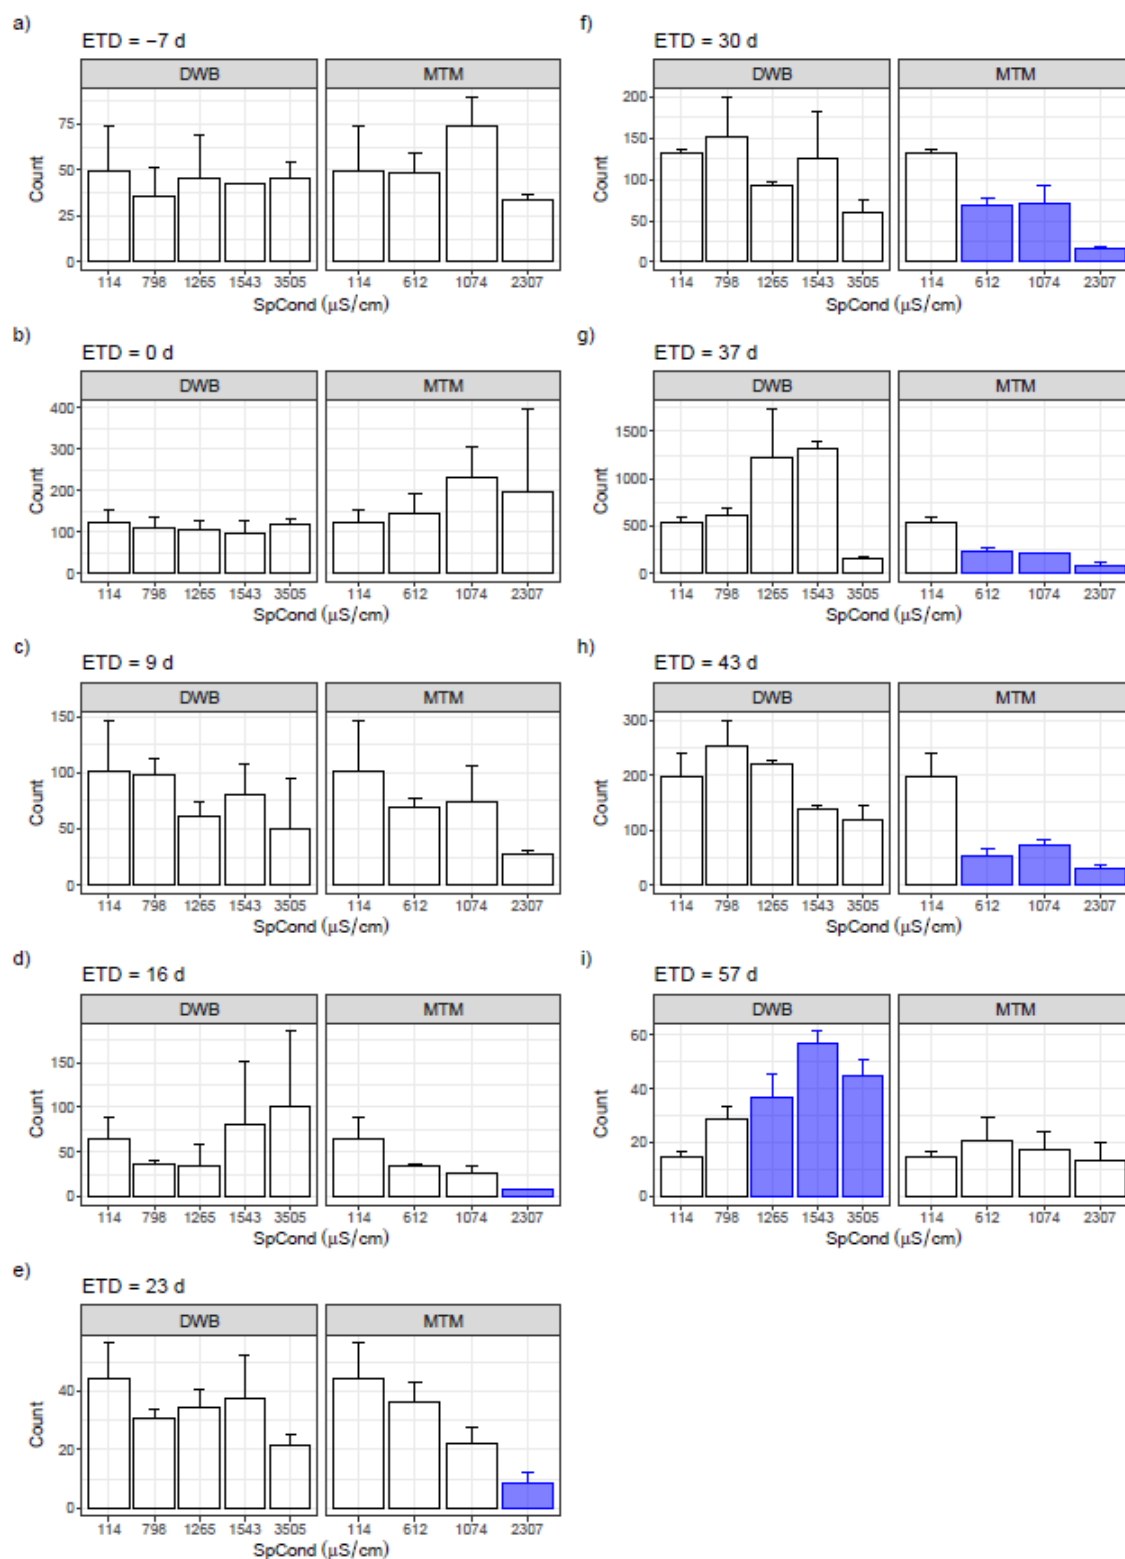

Figure S5. Adult Insect Emergence results (total count) collected at different time points: graphs a – i. Colored bars denote significant difference from control ( $p < 0.05$ ). N=two per dose. ETD = -7 denotes 7 days prior to the beginning of dosing.

## References

1. Dresel, P.E.; Rose, A.W. Chemistry and origin of oil and gas well brines in western Pennsylvania. *Pennsylvania Geological Survey, 4th ser.*, **2010**, *Open-File Report OFOG 10-01.0*, 48p.
2. Osborn, S., G.; McIntosh, J., C. Chemical and isotopic tracers of the contribution of microbial gas in Devonian organic-rich shales and reservoir sandstones, northern Appalachian Basin. *Applied Geochemistry* **2010**, *25*, 456-471, doi:10.1016/j.apgeochem.2010.01.001.
3. Hayes, T. Sampling and analysis of water streams associated with the development of Marcellus shale gas. *Gas Technology Institute Report* **2009**, *Marcellus Shale Coalition*, 49p.
4. Stout, W.; Lamborn, R.E.; Schaaf, D. Brines of Ohio (a preliminary report). *Geological Survey of Ohio* **1932**, *4th series, Bulletin 37*, 35p.
5. Breen, K.J.; Angelo, C.G.; Masters, R.W.; Sedam, A.C. *Chemical and isotopic characteristics of brines from three oil- and gas-producing sandstones in eastern Ohio, with applications to the geochemical tracing of brine sources*; 84-4314; Reston, VA, 1985.
6. USEPA. Proceedings of the technical workshops for the hydraulic fracturing study: Water resources management. U.S. Environmental Protection Agency, Office of Research and Development, Washington, DC **2011**, EPA/600/R-11/048, 125p.
7. Kunz, J.L.; Conley, J.M.; Buchwalter, D.B.; Norberg-King, T.J.; Kemble, N.E.; Wang, N.; Ingersoll, C.G. Use of reconstituted waters to evaluate effects of elevated major ions associated with mountaintop coal mining on freshwater invertebrates. *Environmental Toxicology and Chemistry* **2013**, *32*, 2826-2835, doi:10.1002/etc.2391.
8. USEPA. The effects of mountaintop mines and valley fills on aquatic ecosystems of the central Appalachian coalfields. U.S. Environmental Protection Agency, Washington, DC **2011**, EPA/600/R-09/138F, 153p.
9. Pond, G.J.; Passmore, M.E.; Borsuk, F.A.; Reynolds, L.; Rose, C.J. Downstream effects of mountaintop coal mining: comparing biological conditions using family- and genus-level macroinvertebrate bioassessment tools. *Journal of the North American Benthological Society* **2008**, *27*, 717-737, doi:10.1899/08-015.1.
10. Fritz, K.M.; Fulton, S.; Johnson, B.R.; Barton, C.D.; Jack, J.D.; Word, D.A.; Burke, R.A. Structural and functional characteristics of natural and constructed channels draining a reclaimed mountaintop removal and valley fill coal mine. *Journal of the North American Benthological Society* **2010**, *29*, 673-689, doi:10.1899/09-060.1.
11. Hartman, K.J.; Kaller, M.D.; Howell, J.W.; Sweka, J.A. How much do valley fills influence headwater streams? *Hydrobiologia* **2005**, *532*, 91, doi:10.1007/s10750-004-9019-1.
12. Bryant, L.D.; McPhilliamy, S.; Childers, H. *Draft programmatic environmental impact statement on mountaintop-mining/valley fills in Appalachia - 2003: A survey of the water quality of streams in the primary region of mountaintop/valley fill coal mining, October 1999 to January 2001*; U.S. Environmental Protection Agency, Region 3: Philadelphia PA, 2002.
13. Rao, C.R. The Use and Interpretation of Principal Component Analysis in Applied Research. *Sankhyā: The Indian Journal of Statistics, Series A (1961-2002)* **1964**, *26*, 329-358.
14. Van den Brink, P.J.; Braak, C.J.F.T. Principal response curves: Analysis of time-dependent multivariate responses of biological community to stress. *Environmental Toxicology and Chemistry* **1999**, *18*, 138-148, doi:https://doi.org/10.1002/etc.5620180207.
